# Supplementary material for: Engineering Yarrowia lipolytica as a chassis for de novo synthesis of five aromatic-derived natural products and chemicals
Source: bioRxiv or medRxiv preprint supplement (doi:10.1101/2020.04.04.025288), 2020-08-06
Supplement: Supplementary file [file media-1.pdf]

Supplementary materials for

**Engineering *Y. lipolytica* as a chassis for *de novo* synthesis of  
aromatic-derived natural products and chemicals**

Yang Gu<sup>a,b</sup>, Jingbo Ma<sup>a</sup>, Yonglian Zhu<sup>b</sup>, Xinyu Ding<sup>b</sup>, Peng Xu<sup>a,\*</sup>

<sup>a</sup> Department of Chemical, Biochemical and Environmental Engineering, University of Maryland, Baltimore County, Baltimore, MD, 21250, USA

<sup>b</sup> Key Laboratory of Carbohydrate Chemistry and Biotechnology, Ministry of Education, Jiangnan University, Wuxi 214122, China

\*Corresponding author.

E-mail addresses: [pengxu@umbc.edu](mailto:pengxu@umbc.edu) (P. Xu)

## Supplementary Table

**Table 1. Strains and plasmids used in this study**

| Names          | Characteristics                                                                                                                                                                                                                                                                                                                                                                                                           | Reference                    |
|----------------|---------------------------------------------------------------------------------------------------------------------------------------------------------------------------------------------------------------------------------------------------------------------------------------------------------------------------------------------------------------------------------------------------------------------------|------------------------------|
| <b>Strains</b> |                                                                                                                                                                                                                                                                                                                                                                                                                           |                              |
| po1g           | Wild-type strain W29 (ATCC20460) derivative; W29 $\Delta$ matA $\Delta$ xpr2-332 $\Delta$ axp-2 $\Delta$ leu2-270 pBR platform                                                                                                                                                                                                                                                                                            | (Madzak, Treton et al. 2000) |
| po1f           | po1g derivative; Further deletion of gene <i>ura</i> ; po1g $\Delta$ ura3                                                                                                                                                                                                                                                                                                                                                 | (Madzak, Treton et al. 2000) |
| po1fk          | po1f derivative; Further deletion of gene <i>ku70</i> ; po1f $\Delta$ ku70::loxP                                                                                                                                                                                                                                                                                                                                          |                              |
| YL0            | po1fk pYLXP'                                                                                                                                                                                                                                                                                                                                                                                                              |                              |
| YL1            | po1fk pYLXP'-yIPAR4                                                                                                                                                                                                                                                                                                                                                                                                       |                              |
| YL2            | po1fk pYLXP'-yIARO10                                                                                                                                                                                                                                                                                                                                                                                                      | This work                    |
| YL3            | po1fk pYLXP'-yIPHA2                                                                                                                                                                                                                                                                                                                                                                                                       | This work                    |
| YL4            | po1fk pYLXP'-yIARO7                                                                                                                                                                                                                                                                                                                                                                                                       | This work                    |
| YL5            | po1fk pYLXP'-yIPAR4-yIARO10-yIPHA2-yIARO7                                                                                                                                                                                                                                                                                                                                                                                 | This work                    |
| YL6            | po1fk pYLXP'-yIPAR4-yIARO10-yIPHA2-yIARO7-ScARO7 <sup>G141S</sup>                                                                                                                                                                                                                                                                                                                                                         | This work                    |
| YL7            | po1fk derivative; Further integration of genes <i>yIPAR4</i> , <i>yIARO10</i> , <i>yIPHA2</i> , <i>yIARO7</i> , and <i>ScARO7<sup>G141S</sup></i> at <i>YAL10E30965g</i> site; po1fk <i>yIPAR4 yIARO10 yIPHA2 yIARO7 ScARO7<sup>G141S</sup>::loxP</i>                                                                                                                                                                     | This work                    |
| YL8            | YL7 pYLXP'-yIARO1                                                                                                                                                                                                                                                                                                                                                                                                         | This work                    |
| YL9            | YL7 pYLXP'-yIARO2                                                                                                                                                                                                                                                                                                                                                                                                         | This work                    |
| YL10           | YL7 pYLXP'-yIARO3                                                                                                                                                                                                                                                                                                                                                                                                         | This work                    |
| YL11           | YL7 pYLXP'-yIARO4                                                                                                                                                                                                                                                                                                                                                                                                         | This work                    |
| YL12           | YL7 pYLXP'-yIARO5                                                                                                                                                                                                                                                                                                                                                                                                         | This work                    |
| YL13           | YL7 pYLXP'-yIARO1-yIARO2                                                                                                                                                                                                                                                                                                                                                                                                  | This work                    |
| YL14           | YL7 pYLXP'-yIARO1-yIARO2-yIARO3-yIARO4-yIARO5                                                                                                                                                                                                                                                                                                                                                                             | This work                    |
| YL15           | YL7 pYLXP'-yIARO1-yIARO2-scARO4 <sup>K229L</sup>                                                                                                                                                                                                                                                                                                                                                                          | This work                    |
| YL16           | YL7 pYLXP'-yIARO1-yIARO2-ecaroG <sup>L175D</sup>                                                                                                                                                                                                                                                                                                                                                                          | This work                    |
| YL17           | YL7 pYLXP'-yIARO1-yIARO2-ecaroG <sup>S180F</sup>                                                                                                                                                                                                                                                                                                                                                                          | This work                    |
| YL18           | po1fk derivative; Further deletion of genes <i>yITYR1</i> ; po1fk $\Delta$ yITYR1::loxP                                                                                                                                                                                                                                                                                                                                   | This work                    |
| YL19           | YL18 derivative; Further Deletion of genes <i>yITRP2</i> , and <i>yITRP3</i> ; po1fk $\Delta$ yITYR1 $\Delta$ yITRP2 $\Delta$ yITRP3::loxP                                                                                                                                                                                                                                                                                | This work                    |
| YL20           | YL19 derivative; Further Deletion of genes <i>yIARO8</i> , and <i>yIARO9</i> ; po1fk $\Delta$ yITYR1 $\Delta$ yITRP2 $\Delta$ yITRP3 $\Delta$ yIARO8 $\Delta$ yIARO9::loxP                                                                                                                                                                                                                                                | This work                    |
| YL21           | YL18 pYLXP'-yIPAR4-yIARO10-yIPHA2-yIARO7-ScARO7 <sup>G141S</sup>                                                                                                                                                                                                                                                                                                                                                          | This work                    |
| YL22           | YL19 pYLXP'-yIPAR4-yIARO10-yIPHA2-yIARO7-ScARO7 <sup>G141S</sup>                                                                                                                                                                                                                                                                                                                                                          | This work                    |
| YL23           | YL20 pYLXP'-yIPAR4-yIARO10-yIPHA2-yIARO7-ScARO7 <sup>G141S</sup>                                                                                                                                                                                                                                                                                                                                                          | This work                    |
| YL24           | YL20 derivative; Further integration of genes <i>yIARO1</i> , <i>yIARO2</i> , <i>yIARO3</i> , <i>yIARO4</i> , <i>yIARO5</i> , <i>scARO4<sup>K229L</sup></i> , <i>aroG<sup>S180F</sup></i> at <i>YAL10E30965g</i> and <i>ku70</i> sites; po1fk $\Delta$ yITYR1 $\Delta$ yITRP2 $\Delta$ yITRP3 $\Delta$ yIARO8 $\Delta$ yIARO9 <i>yIARO1 yIARO2 yIARO3 yIARO4 yIARO5 scARO4<sup>K229L</sup> aroG<sup>S180F</sup>::loxP</i> | This work                    |

|      |                                                                                                                                                                                                                                                                                                                                                                                                                                                                                                                                                |           |
|------|------------------------------------------------------------------------------------------------------------------------------------------------------------------------------------------------------------------------------------------------------------------------------------------------------------------------------------------------------------------------------------------------------------------------------------------------------------------------------------------------------------------------------------------------|-----------|
| YL25 | YL24 pYLXP'-yIPAR4-yIARO10-yIPHA2-yIARO7-ScARO7 <sup>G141S</sup>                                                                                                                                                                                                                                                                                                                                                                                                                                                                               | This work |
| YL26 | YL24 pYLXP'-yITKT-yIPAR4-yIARO10-yIPHA2-yIARO7-ScARO7 <sup>G141S</sup>                                                                                                                                                                                                                                                                                                                                                                                                                                                                         | This work |
| YL27 | YL24 pYLXP'-bbxfpK-yIPAR4-yIARO10-yIPHA2-yIARO7-ScARO7 <sup>G141S</sup>                                                                                                                                                                                                                                                                                                                                                                                                                                                                        | This work |
| YL28 | YL24 pYLXP'-acxpkA-yIPAR4-yIARO10-yIPHA2-yIARO7-ScARO7 <sup>G141S</sup>                                                                                                                                                                                                                                                                                                                                                                                                                                                                        | This work |
| YL29 | YL24 derivate; Further integration of genes <i>bbxfpK</i> , <i>yIPAR4</i> , <i>yIARO10</i> , <i>yIPHA2</i> , <i>yIARO7</i> , <i>ScARO7</i> <sup>G141S</sup> at pBR platform; po1fk $\Delta yITR1$ $\Delta yITR2$ $\Delta yITR3$ $\Delta yIARO8$ $\Delta yIARO9$ <i>yIARO1</i> <i>yIARO2</i> <i>yIARO3</i> <i>yIARO4</i> <i>yIARO5</i> <i>scARO4</i> <sup>K229L</sup> <i>aroG</i> <sup>S180F</sup> <i>bbxfpK</i> <i>yIPAR4</i> <i>yIARO10</i> <i>yIPHA2</i> <i>yIARO7</i> <i>ScARO7</i> <sup>G141S</sup> :: <i>Leu</i>                          | This work |
| YL30 | YL24 derivate; Further integration of genes <i>acxpkA</i> , <i>yIPAR4</i> , <i>yIARO10</i> , <i>yIPHA2</i> , <i>yIARO7</i> , <i>ScARO7</i> <sup>G141S</sup> at pBR platform; po1fk $\Delta yITR1$ $\Delta yITR2$ $\Delta yITR3$ $\Delta yIARO8$ $\Delta yIARO9$ <i>yIARO1</i> <i>yIARO2</i> <i>yIARO3</i> <i>yIARO4</i> <i>yIARO5</i> <i>scARO4</i> <sup>K229L</sup> <i>aroG</i> <sup>S180F</sup> <i>acxpkA</i> <i>yIPAR4</i> <i>yIARO10</i> <i>yIPHA2</i> <i>yIARO7</i> <i>ScARO7</i> <sup>G141S</sup> :: <i>Leu</i>                          | This work |
| YL31 | YL24 derivate; Further integration of genes <i>yITKT</i> , <i>BbxfpK</i> , and <i>Acxpk</i> at 26s rDNA site; po1fk $\Delta yITR1$ $\Delta yITR2$ $\Delta yITR3$ $\Delta yIARO8$ $\Delta yIARO9$ <i>yIARO1</i> <i>yIARO2</i> <i>yIARO3</i> <i>yIARO4</i> <i>yIARO5</i> <i>scARO4</i> <sup>K229L</sup> <i>aroG</i> <sup>S180F</sup> <i>yITKT</i> <i>bbxfpK</i> <i>acxpk</i> :: <i>loxP</i>                                                                                                                                                      | This work |
| YL32 | YL31 pYLXP'-yIPAR4-yIARO10-yIPHA2-yIARO7-ScARO7 <sup>G141S</sup>                                                                                                                                                                                                                                                                                                                                                                                                                                                                               | This work |
| YL33 | YL31 derivate; Further deletion of gene <i>yIPYK</i> ; po1fk $\Delta yITR1$ $\Delta yITR2$ $\Delta yITR3$ $\Delta yIARO8$ $\Delta yIARO9$ $\Delta yIPYK$ <i>yIARO1</i> <i>yIARO2</i> <i>yIARO3</i> <i>yIARO4</i> <i>yIARO5</i> <i>scARO4</i> <sup>K229L</sup> <i>aroG</i> <sup>S180F</sup> <i>yITKT</i> <i>bbxfpK</i> <i>acxpk</i> :: <i>loxP</i>                                                                                                                                                                                              | This work |
| YL34 | YL33 pYLXP'-yIPAR4-yIARO10-yIPHA2-yIARO7-ScARO7 <sup>G141S</sup>                                                                                                                                                                                                                                                                                                                                                                                                                                                                               | This work |
| YL35 | YL33 derivate; Further integration of genes <i>yIPAR4</i> , <i>yIARO10</i> , <i>yIPHA2</i> , <i>yIARO7</i> , <i>ScARO7</i> <sup>G141S</sup> at pBR platform; po1fk $\Delta yITR1$ $\Delta yITR2$ $\Delta yITR3$ $\Delta yIARO8$ $\Delta yIARO9$ $\Delta yIPYK$ <i>yIARO1</i> <i>yIARO2</i> <i>yIARO3</i> <i>yIARO4</i> <i>yIARO5</i> <i>scARO4</i> <sup>K229L</sup> <i>aroG</i> <sup>S180F</sup> <i>yITKT</i> <i>bbxfpK</i> <i>acxpk</i> <i>yIPAR4</i> <i>yIARO10</i> <i>yIPHA2</i> <i>yIARO7</i> <i>ScARO7</i> <sup>G141S</sup> :: <i>Leu</i> | This work |
| YL36 | YL31 derivate; Further integration of genes <i>yIPAR4</i> , <i>yIARO10</i> , <i>yIPHA2</i> , <i>yIARO7</i> , <i>ScARO7</i> <sup>G141S</sup> at pBR platform; po1fk $\Delta yITR1$ $\Delta yITR2$ $\Delta yITR3$ $\Delta yIARO8$ $\Delta yIARO9$ <i>yIARO1</i> <i>yIARO2</i> <i>yIARO3</i> <i>yIARO4</i> <i>yIARO5</i> <i>scARO4</i> <sup>K229L</sup> <i>aroG</i> <sup>S180F</sup> <i>yITKT</i> <i>bbxfpK</i> <i>acxpk</i> <i>yIPAR4</i> <i>yIARO10</i> <i>yIPHA2</i> <i>yIARO7</i> <i>ScARO7</i> <sup>G141S</sup> :: <i>Leu</i>                | This work |
| YL37 | YL35 derivate; Further deletion of genes <i>yIALD2</i> and <i>yIALD3</i> ; po1fk $\Delta yITR1$ $\Delta yITR2$ $\Delta yITR3$ $\Delta yIARO8$ $\Delta yIARO9$ $\Delta yIPYK$ $\Delta yIALD2$ $\Delta yIALD3$ <i>yIARO1</i> <i>yIARO2</i> <i>yIARO3</i> <i>yIARO4</i> <i>yIARO5</i> <i>scARO4</i> <sup>K229L</sup> <i>aroG</i> <sup>S180F</sup> <i>yITKT</i> <i>bbxfpK</i> <i>acxpk</i> <i>yIPAR4</i> <i>yIARO10</i> <i>yIPHA2</i> <i>yIARO7</i> <i>ScARO7</i> <sup>G141S</sup> :: <i>Leu</i>                                                   | This work |
| YL38 | YL37 derivate; Further deletion of genes <i>yIHPD</i> ; po1fk $\Delta yITR1$ $\Delta yITR2$ $\Delta yITR3$ $\Delta yIARO8$ $\Delta yIARO9$ $\Delta yIPYK$ $\Delta yIALD2$ $\Delta yIALD3$ $\Delta yIHPD$ <i>yIARO1</i> <i>yIARO2</i> <i>yIARO3</i> <i>yIARO4</i> <i>yIARO5</i> <i>scARO4</i> <sup>K229L</sup> <i>aroG</i> <sup>S180F</sup> <i>yITKT</i> <i>bbxfpK</i> <i>acxpk</i> <i>yIPAR4</i> <i>yIARO10</i> <i>yIPHA2</i> <i>yIARO7</i> <i>ScARO7</i> <sup>G141S</sup> :: <i>Leu</i>                                                       | This work |
| YL39 | YL33 derivate; Further integration of genes <i>rgTAL</i> and <i>yITYR1</i> at pBR platform; po1fk $\Delta yITR1$ $\Delta yITR2$ $\Delta yITR3$ $\Delta yIARO8$ $\Delta yIARO9$ $\Delta yIPYK$ <i>yIARO1</i> <i>yIARO2</i> <i>yIARO3</i> <i>yIARO4</i> <i>yIARO5</i> <i>scARO4</i> <sup>K229L</sup> <i>aroG</i> <sup>S180F</sup> <i>yITKT</i> <i>bbxfpK</i> <i>acxpk</i> <i>rgTAL</i> <i>yITYR1</i> :: <i>Leu</i>                                                                                                                               | This work |
| YL40 | YL39 derivate; Further deletion of genes <i>yIPHA2</i> ; po1fk $\Delta yITR1$ $\Delta yITR2$ $\Delta yITR3$ $\Delta yIARO8$ $\Delta yIARO9$ $\Delta yIPYK$ $\Delta yIPHA2$ <i>yIARO1</i> <i>yIARO2</i> <i>yIARO3</i> <i>yIARO4</i> <i>yIARO5</i> <i>scARO4</i> <sup>K229L</sup> <i>aroG</i> <sup>S180F</sup> <i>yITKT</i> <i>bbxfpK</i> <i>acxpk</i> <i>rgTAL</i> <i>yITYR1</i> :: <i>Leu</i>                                                                                                                                                  | This work |
| YL41 | YL33 derivate; Further integration of genes <i>VioA</i> , <i>VioB</i> , <i>VioC</i> , <i>VioD</i> , and <i>VioE</i> at pBR platform; po1fk $\Delta yITR1$ $\Delta yITR2$ $\Delta yITR3$ $\Delta yIARO8$ $\Delta yIARO9$ $\Delta yIPYK$ <i>yIARO1</i>                                                                                                                                                                                                                                                                                           | This work |

|        |                                                                                                                                                                                                                                                                                                                                                                                           |           |
|--------|-------------------------------------------------------------------------------------------------------------------------------------------------------------------------------------------------------------------------------------------------------------------------------------------------------------------------------------------------------------------------------------------|-----------|
|        | <i>ylARO2 ylARO3 ylARO4 ylARO5 scARO4<sup>K229L</sup> aroG<sup>S180F</sup> yITKT bbx<sub>fp</sub>K yLTRP2 yLTRP3 acxpk VioA VioB VioC VioD VioE::Leu</i>                                                                                                                                                                                                                                  |           |
| YL42   | YL41 derivate; Further integration of genes <i>yLTRP5, yLTRP4, yLTRP3, yLTRP2,</i> and <i>yLTRP1</i> at <i>YALIOE03212g</i> site; po1fk <i>ΔyITYR1 ΔyLTRP2 ΔyLTRP3 ΔylARO8 ΔylARO9 ΔyIPYK ylARO1 ylARO2 ylARO3 ylARO4 ylARO5 scARO4<sup>K229L</sup> aroG<sup>S180F</sup> yITKT bbx<sub>fp</sub>K acxpk yLTRP5 yLTRP4 yLTRP3 yLTRP2 yLTRP1 yLTRP2 yLTRP3 VioA VioB VioC VioD VioE::Leu</i> | This work |
| pof1kV | po1fk derivate; Further integration of genes <i>VioA, VioB, VioC, VioD,</i> and <i>VioE</i> at pBR                                                                                                                                                                                                                                                                                        | This work |

\*\*\*\*\*

### Plasmids

|                                                                    |                                                                                                  |                             |
|--------------------------------------------------------------------|--------------------------------------------------------------------------------------------------|-----------------------------|
| pYLXP'                                                             | YaliBrick plasmid                                                                                | (Wong, Engel et al. 2017)   |
| pYLXP'- <i>loxP-ura</i>                                            | pYLXP' containing the <i>loxP-URA-loxP</i> cassette                                              | (Lv, Edwards et al. 2019)   |
| pYLXP'- <i>loxP-hygr</i>                                           | pYLXP' containing the <i>loxP-hygr-loxP</i> cassette                                             | (Lv, Edwards et al. 2019)   |
| pYLXP'- <i>Cre</i>                                                 | pYLXP' containing gene <i>Cre</i>                                                                | (Lv, Edwards et al. 2019)   |
| pYLXPs'                                                            | pYLXP' derivate; <i>NotI</i> site was mutated to <i>SnaBI</i> site                               | This work                   |
| pURLA                                                              | <i>Ku70</i> site integration plasmid                                                             | This work                   |
| pURLK                                                              | <i>YALIOE30965g</i> site integration plasmid                                                     | This work                   |
| pURLD                                                              | <i>YALIOE03212g</i> site integration plasmid                                                     | This work                   |
| prDNAloxP                                                          | 26s rDNA site integration plasmid                                                                | (Lv, Edwards et al. 2019)   |
| pYLXP'- <i>yIPAR4</i>                                              | pYLXP' containing gene <i>yIPAR4</i>                                                             |                             |
| pYLXP'- <i>yIARO10</i>                                             | pYLXP' containing gene <i>yIARO10</i>                                                            |                             |
| pYLXP'- <i>yIPHA2</i>                                              | pYLXP' containing gene <i>yIPHA2</i>                                                             | This work                   |
| pYLXP'- <i>yIARO7</i>                                              | pYLXP' containing gene <i>yIARO7</i>                                                             | This work                   |
| pYLXP'- <i>yIPAR4-yIARO10-yIPHA2-yIARO7</i>                        | pYLXP' containing gene <i>yIPAR4, yIARO10, yIPHA2,</i> and <i>yIARO7</i>                         | This work                   |
| pYLXP'- <i>yIPAR4-yIARO10-yIPHA2-yIARO7-ScARO7<sup>G141S</sup></i> | pYLXP' containing gene <i>yIPAR4, yIARO10, yIPHA2, yIARO7,</i> and <i>ScARO7<sup>G141S</sup></i> | This work                   |
| pURLA- <i>yIPAR4-yIARO10-yIARO7-yIPHA2-scARO7<sup>G141S</sup></i>  | pURLA containing gene <i>yIPAR4, yIARO10, yIPHA2, yIARO7,</i> and <i>ScARO7<sup>G141S</sup></i>  | This work                   |
| pYLXP'- <i>yIARO1</i>                                              | pYLXP' containing gene <i>yIARO1</i>                                                             | (Lv, Marsafari et al. 2019) |
| pYLXP'- <i>yIARO2</i>                                              | pYLXP' containing gene <i>yIARO2</i>                                                             | This work                   |

|                                                                                  |                                                                                                           |                           |
|----------------------------------------------------------------------------------|-----------------------------------------------------------------------------------------------------------|---------------------------|
| pYLXP'-yIARO3                                                                    | pYLXP' containing gene yIARO3                                                                             | This work                 |
| pYLXP'-yIARO4                                                                    | pYLXP' containing gene yIARO4                                                                             | This work                 |
| pYLXP'-yIARO5                                                                    | pYLXP' containing gene yIARO5                                                                             | This work                 |
| pYLXP'-yIARO1-yIARO2                                                             | pYLXP' containing gene yIARO1 and yIARO2                                                                  | This work                 |
| pYLXP'-yIARO1-yIARO2-yIARO3-yIARO4-yIARO5                                        | pYLXP' containing gene yIARO1, yIARO2, yIARO3, yIARO4, and yIARO5                                         | This work                 |
| pYLXP'-yIARO1-yIARO2-scARO4 <sup>K229L</sup>                                     | pYLXP' containing gene yIARO1, yIARO2, scARO4 <sup>K229L</sup>                                            | This work                 |
| pYLXP'-yIARO1-yIARO2-ecaroG <sup>L175D</sup>                                     | pYLXP' containing gene yIARO1, yIARO2, ecaroG <sup>L175D</sup>                                            | This work                 |
| pYLXP'-yIARO1-yIARO2-ecaroG <sup>S180F</sup>                                     | pYLXP' containing gene yIARO1, yIARO2, ecaroG <sup>S180F</sup>                                            | This work                 |
| pYLXP'-loxP-hygr-ΔyITYR1                                                         | pYLXP'-loxP-hygr containing gene yITYR1 deletion cassette                                                 | This work                 |
| pYLXP'-loxP-hygr-ΔyITRP2                                                         | pYLXP'-loxP-hygr containing gene yITRP2 deletion cassette                                                 | This work                 |
| pYLXP'-loxP-hygr-ΔyITRP3                                                         | pYLXP'-loxP-hygr containing gene yITRP3 deletion cassette                                                 | This work                 |
| pYLXP'-loxP-hygr-ΔyIARO8                                                         | pYLXP'-loxP-hygr containing gene yIARO8 deletion cassette                                                 | This work                 |
| pYLXP'-loxP-hygr-ΔyIARO9                                                         | pYLXP'-loxP-hygr containing gene yIARO9 deletion cassette                                                 | This work                 |
| pURLA-yIARO2-yIARO3-yIARO4-yIARO5-scARO4 <sup>K229L</sup> -aroG <sup>S180F</sup> | pURLA containing gene yIARO2, yIARO3, yIARO4, yIARO5, scARO4 <sup>K229L</sup> , and aroG <sup>S180F</sup> | This work                 |
| pURLK-yIARO1                                                                     | pURLK containing gene yIARO1                                                                              | This work                 |
| pYLXP'-yITKT-yIPAR4-yIARO10-yIPHA2-yIARO7-ScARO7 <sup>G141S</sup>                | pYLXP' containing gene yITKT, yIPAR4, yIARO10, yIPHA2, and yIARO7                                         | This work                 |
| pYLXP'-bbxjpk-yIPAR4-yIARO10-yIPHA2-yIARO7-ScARO7 <sup>G141S</sup>               | pYLXP' containing gene bbxjpk, yIPAR4, yIARO10, yIPHA2, and yIARO7                                        | This work                 |
| pYLXP'-acxpkA-yIPAR4-yIARO10-yIPHA2-yIARO7-ScARO7 <sup>G141S</sup>               | pYLXP' containing gene acxpkA, yIPAR4, yIARO10, yIPHA2, and yIARO7                                        | This work                 |
| prDNAloxP-yITKT-bbxjpk-acxpk                                                     | prDNAloxP containing gene yITKT, bbxjpk, and acxpk                                                        | This work                 |
| pYLXP'-loxP-ura-yIPYK                                                            | pYLXP'-loxP-ura containing gene yIPYK deletion cassette                                                   | This work                 |
| pYLXP'-loxP-hygr-yIALD2                                                          | pYLXP'-loxP-hygr containing gene yIALD2 deletion cassette                                                 | This work                 |
| pYLXP'-loxP-hygr-yIALD3                                                          | pYLXP'-loxP-hygr containing gene yIALD3 deletion cassette                                                 | This work                 |
| pYLXP'-loxP-hygr-yIHPD                                                           | pYLXP'-loxP-ura containing gene yIHPD deletion cassette                                                   | This work                 |
| pYLXP'-rgTAL-yITYR1                                                              | pYLXP' containing gene rgTAL and yITYR1                                                                   | This work                 |
| pYLXP'-rgTAL-yITYR1-VvSTS1-Pc4CL2                                                | pYLXP' containing gene rgTAL, yITYR1, VvSTS1, and Pc4CL2                                                  | This work                 |
| pYLXP'-loxP-hygr-yIPHA2                                                          | pYLXP'-loxP-hygr containing gene yIPHA2 deletion cassette                                                 | (Wong, Engel et al. 2017) |
| pYLXP'-VioDCBAE                                                                  | pYLXP' containing gene VioA, VioB, VioC, VioD, and VioE                                                   | This work                 |
| pYLXP'-yITRP2-yITRP3-VioDCBAE                                                    | pYLXP' containing gene yITRP2, yITRP3, VioA, VioB, VioC, VioD, and VioE                                   | This work                 |
| pYLXP'-loxP-hygr-yIARO7                                                          | pYLXP'-loxP-hygr containing gene yIARO7 deletion cassette                                                 | This work                 |

**Table 2. Primers used in this study**

| Primers          | Sequence                                              |
|------------------|-------------------------------------------------------|
| TRP2_Dw-F        | tagcgagacaataacggaggaTTGGAGAGTGTGAGCTCTCGTTC          |
| TRP2_Dw-R        | gttacatcctttatcagacataGAGTAGGAATGCTCCGATGTACGC        |
| TRP2_Up-F        | ggcatccctaaattgatgaaagATCCATTGTTGGTTGATGCCC           |
| TRP2_Up-R        | taatgatgctatacgaagttatGGTGGTGTAGTTCGGGGTG             |
| TRP3_Dw-F        | gctagcgagacaataacggaggaAGGCGATGAAGATGCACTTCAT         |
| TRP3_Dw-R        | ttacatcctttatcagacataAATTAACAGGGTCACACGAGCTCT         |
| TRP3_Up-F        | gcatccctaaattgatgaaagGCTGCCAGAGTGCATTTCTCG            |
| TRP3_Up-R        | taatgatgctatacgaagttatTGTGGAGTAAGTGAAGCCGTTGAG        |
| TYP1_Dw-F        | gctagcgagacaataacggaggaGACACACTTGCAGGTCTAAAAGTTCC     |
| TYP1_Dw-R        | ttacatcctttatcagacataCCTCCGAAGAGGCTCTCAAATGA          |
| TYP1_Up-F        | ggcatccctaaattgatgaaagGGACAGAGTGTCCAACAAGCCAAT        |
| TYP1_Up-R        | aatgatgctatacgaagttatcGTTGTAGAGCGTGGCGAAAAGT          |
| ALD3_Dw-F        | gctagcgagacaataacggaggaAGGCCGTCCACATTAACCTGG          |
| ALD3_Dw-R        | gttacatcctttatcagacataCTGCTGCAACCAGCCCTACAAA          |
| ALD3_Up-F        | gcatccctaaattgatgaaagCAAGAAGGGATAAAAATGGAAACTCGGTCT   |
| ALD3_Up-R        | taatgatgctatacgaagttatACTTGCACTAGGTTAGCAGCGAC         |
| ALD2_Dw-F        | gctagcgagacaataacggaggaACGATGAGCGAACGAATCGTCT         |
| ALD2_Dw-R        | gttacatcctttatcagacataTCTGTTGGATTCTAGGGAAGTGTCTG      |
| ALD2_Up-F        | ggcatccctaaattgatgaaagCCGCTCTCAAGTGTCTGAAAGTTGAAT     |
| ALD2_Up-R        | taatgatgctatacgaagttatATATTTAGAGTTCGGGATAAAAGTTCAATGT |
| ALD2_Cas-F       | CCGCTCTCAAGTGTCTGAAAGTTGAAT                           |
| ALD2_Cas-R       | TCTGTTGGATTCTAGGGAAGTGTCTG                            |
| TYP1_Cas-F       | GGACAGAGTGTCCAACAAGCCAAT                              |
| TYP1_Cas-R       | CTCCGAAGAGGCTCTCAAATGA                                |
| TRP3_Cas-F       | GCTGCCAGAGTGCATTTCTCG                                 |
| TRp3_Cas-R       | AATTAACAGGGTCACACGAGCTCT                              |
| TRP2_Cas-F       | ATCCATTGTTGGTTGATGCCC                                 |
| TRP2_Cas_R       | GAGTAGGAATGCTCCGATGTACGC                              |
| ALD3_Cas-F       | CAAGAAGGGATAAAAATGGAAACTCGGTCT                        |
| ALD3_Cas-R       | CTGCTGCAACCAGCCCTACAAA                                |
| TYP1_DwChk-R     | AGGATAAGAAGGCCAAGGCTTCT                               |
| TYP1_UpChk-F     | ATGGATCTAAACGCTGGCGTCT                                |
| TRP2_DwChk-R     | CATTGATGCACGCATCATTCCC                                |
| TRP2_UpChk-F     | AAGTAGTAGGACAAGGGGTTGGC                               |
| ALD2_DwChk-R     | ACTCCTCTAGACTCCTCTGTTC                                |
| ALD2_UpChk-F     | GTGTCTCCATCACATGACCACAATC                             |
| TRP3_DwChk-R     | ACGGTAAACCTCACCTGATCCG                                |
| TRP3_UpChk-F     | CTCTTCGACTGTTGGCTCTGTCTC                              |
| ALD3_DwChk-R     | TAGCCTCGTTAATGCACCGAGT                                |
| ALD3_UpChk-F     | GGGAATGCTCCATTGAGATGATGGA                             |
| ARO1_Ing_R(Ku70) | CCTAGtctccgttattgtctcgggacacgggcatctcacttgc           |

ARO1\_Int\_F(ku70) tagcatacattatacgaagttattgaaagcctaggagcagacagagac  
 ku70-Dw-R(NotI) acatccttttatcagacataggcggccgcAGTGAACGACCAAGACTAAAGGGTG  
 ku70\_Up-F(NotI) ggcatccctaaattgatgaaaggcggccgcTGACCATTCTACCCGGGGTCTG  
 PHA2\_DwChkR AGAATACCTTGATTCTGGCCACCG  
 PHA2\_UpChkF TCTGGCCGAGTTCAAGCTCCA  
 PHA2\_CasF TACCATCACCGACCCAGAGACCA  
 PHA2\_CasR TGCCGCATGCCATTAGCTA  
 PHA2\_DwF gctagcagacaataacggaggaCTTAGACGGTTCAGCGTTTCTGT  
 PHA2\_DwR tacatccttttatcagacataTGCCGCATGCCATTAGCTA  
 PHA2\_UpF atccctaaattgatgaaagTACCATCACCGACCCAGAGACCA  
 PHA2\_UpR atgtatgcatacgaagttatGATGTGTAATGTGTGTGATCAAGTGTGC  
 ARO3\_F gcactttttgcagtactaaccgcagcccgtatgcacaacgcttctaa  
 ARO3\_R aggccatggaactagtcggtaccctaacctcgtcagcttgaagg  
 ARO4-F gcactttttgcagtactaaccgcagccacccaaagtcttattaccgat  
 ARO4-R ggccatggaactagtcggtaccctacttctgggctctcatgctgt  
 ARO5-F cactttttgcagtactaaccgcagtcctcctcctcctccaac  
 ARO5-R ggccatggaactagtcggtacccttagttcttcttctcgtcctctgac  
 ARO2\_F cagcactttttgcagtactaaccgcagAGCACTTTCGGCACGCTT  
 ARO2\_R acaggccatggaactagtcggtaccTTAGAAAAAGGACTTTGCGCCCTTTCT  
 pTEF-Rvs ccggatggccagacaaagaaaca  
 XPR2-Fw gtaaatagaaaatctggctttaggtggcaaat  
 CEN1\_F atttcacagtctgaactttttgcagattacc  
 ORI1001\_R tggatctaaggttcgtactcaacactcac  
 HPD\_CheckF GCTACTTGTTGTAGACGTAGACATACACT  
 HPD\_CheckR TATTCGCACGACACTGACATTTAAGGC  
 HPD\_CasF CCGTACGTAAGAGACTGCCATAAGT  
 HPD\_CasR CTCCCCTCCTGCTCACCCC  
 HPD\_Dw\_F cgagacaataacggaggaTCATCTCTAGAGACGAGGCGTGC  
 HPD\_Dw\_R agcttgctatgttacatccttttatcagacataCTCCCCTCCTGCTCACCCC  
 HPD\_Up\_F ccctaaatttgatgaaagCCGTACGTAAGAGACTGCCATAAGT  
 HPD\_Up\_R atgtatcagaagttatGTTGTTGGTGTATTGTTGTTGTGTGTA  
 EcAroG(L175D)\_1F ccagcactttttgcagtactaaccgcagaattatcagaacgacgatttacgcatcaaag  
 EcAroG(L175D)\_2R ggacagggccatggaactagtcggtacccttaccgacgagcgttttac  
 EcAroG(L175G)\_1R ctgatgcatcttcggtgac  
 EcAroG(L175G)\_2F gcaccgcaagatgcatcag  
 SaARO7(G141S)\_2R aggccatggaactagtcggtacccttactcttccaacctttagcaagtattccac  
 ScARO7(G141S)\_1F gcactttttgcagtactaaccgcagatttcacaaaccagaaactgttttaactctac  
 ScARO7(G141S)\_1R aacagaagagaagttattcttatcatcaccatctc  
 ScARO7(G141S)\_2F agagatggtgatgataagaataacttcttctgtt  
 EcAroG(S180F)\_1F gcactttttgcagtactaaccgcagaattatcagaacgacgatttacgcatcaaag  
 EcAroG(S180F)\_1R cggacagaaaagccctgatgcca  
 EcAroG(S180F)\_2F tggcatcagggcttttctgtccg  
 EcAroG(S180F)\_2R gggacagggccatggaactagtcggtacccttaccgacgagcgttttac  
 ScAro4(K229L)\_1F ccagcactttttgcagtactaaccgcagagtgatctccaatgttcgctgc

|                  |                                                                            |
|------------------|----------------------------------------------------------------------------|
| ScARO4(K229L)_1R | accatgcaaagtaacacccatgaaat                                                 |
| ScARo4(K229L)_2F | atntcatgggtgttactttgcatggt                                                 |
| ScARO4(K229L)_2R | ggccatggaactagtcggtaccctatttcttgaactctcttcttctgtctgacagc                   |
| ylgapN_DwR(2)    | acatccttttatcagacataAGCTCAATAGCCCACGACTATAGTC                              |
| ARO7_DwChkR      | CAAAGACACCCGGCTCAGC                                                        |
| ARO7_UpChkF      | CTTCTGGTTTACTCCGATACGGGGA                                                  |
| 26s rDNA_DwF     | ctttaccgcagcagatccgcccgcagatcttggtgtagtagcaaattcaaatg                      |
| 26s rDNA_DwR     | agatccactattggcctatcctaggccgcggtccggctgccag                                |
| ylTYR1_F         | cactttttgcagtactaaccgcagtctattgaggaatggaagaaaaccaagctag                    |
| ylTYR1_R         | ggggacaggccatggaactagtcggtacctaagtgggtgacagaatgggttgatcat                  |
| ARO7_CasF        | CACACGCTTGATATATATTTATCAAGTTTTTTC                                          |
| ARO7_CasR        | TCTACCGAGGCATCATGCCAC                                                      |
| ARO7_DwF         | gctagcgagacaataaccggaggtagcagAGTAGCGTGTGTTTTTTAGCGAAGC                     |
| ARO7_DwR         | catccttttatcagacatagcggccgcTCTACCGAGGCATCATGCCAC                           |
| ARO7_UpF         | ctaaatttgatgaaaggcggccgcCACACGCTTGATATATATTTATCAAGTTTTTTC                  |
| ARO7_UpR         | aatgatgctatacgaagttaTCCGGCGAATTTGGGCAGA                                    |
| ylTRP5_F         | ccagcactttttgcagtactaaccgcagtctgctcatctggctgccac                           |
| ylTRP5_R         | cgtagggacaggccatggaactagtcggtacctaactcaaatcgaggtcccagtc                    |
| scTRP1_F         | agcactttttgcagtactaaccgcagtctgttattaattcacaggtagttctgtcc                   |
| scTRP1_R         | ggggacaggccatggaactagtcggtaccctatttcttagcatttttgacgaaattgc                 |
| ylTRP2_F         | accagcactttttgcagtactaaccgcaggctccaagaccaaagttctctgatc                     |
| ylTRP2_R         | tggggacaggccatggaactagtcggtaccctaaccaatgagctccttgacaaaagc                  |
| ylTRP4_F         | agcactttttgcagtactaaccgcagtctctgcctctcaacaccagc                            |
| ylTRP4_R         | caactgtagggacaggccatggaactagtcggtacctaagcctctcctcgggccgc                   |
| pUrLp_1F         | gcatacattatacgaagttagctagcgtccggagcggccgcGCATGCaagtcgactatgtctgataaaaggatg |
| pUrLp_1R         | gcagcatcctgcgatgcagatccgaaacataatgggtgcagggc                               |
| pUrLp_2F         | gccctgcaccattatgtttcgatctgcacgcaggatgctgc                                  |
| pUrLp_2R         | cagatccactattggcctatgggg                                                   |
| pUrLp_SeqF       | accgatacgcgagcgaacg                                                        |
| pUrLp_SeqR       | gggcttctgctctcccgg                                                         |
| Ku70_DwF         | gtccggagcggccgcGCATGCaagtcgacaCTAGGGAGGCACATCTAAACGAATAACG                 |
| Ku70_DwR         | gttacatccttttatcagacatacctaggAGTGAACGACCAAGACTAAAGGGTG                     |
| ku70_UpF         | ccctaaatttgatgaaagcctaggCGACTTGATGTTTAGAGTGTCCAGATCC                       |
| ku70_UpR         | taatgatgctatacgaagttaTTTCAAAAAGCGGCGGTTTCGTG                               |
| Ace_DwF          | cggccgcGCATGCaagtcgacaACACTATATAAGAATGTATTTATTTCTCTCTTAACC                 |
| Ace_DwR          | acatccttttatcagacatacctaggGACGCGAGTAGGTTGACTCATACA                         |
| Ace_UpF          | gcatacctaaatttgatgaaagcctaggGCTATTCTTACGGTGTACAGTTACGAGCA                  |
| Ace_UpR          | gtatgctatacgaagttaTGTGTGAGATGGGGTAGTACGGAA                                 |
| Lac_DwF          | gagcggccgcGCATGCaagtcgacaGTACATACGGGTATTTTGGGAAGACACA                      |
| Lac_DwR          | catccttttatcagacatacctaggTTCCAAAACAGGGCTCCAAATGCC                          |
| Lac_UpF          | atccctaaatttgatgaaagcctaggCTTACGACGAGCACGCTTCTGAC                          |
| Lac_UpR          | tatgctatacgaagttaGGTCGTAGTGGTTTGTGGAGGT                                    |
| Ace_DwChkR       | CTCCTTTGTTGGCGAAGATTCCG                                                    |
| Ace_UpChkF       | GTTGTTTACGGCGTTTGACAAG                                                     |



|              |                                                             |
|--------------|-------------------------------------------------------------|
| y TRP1_F     | accagcacttttgcagtactaaccgcaggactttctactcttcgacatgtctacat    |
| y TRP1_R     | cgtggggacaggccatggaactagtcggtaccttaccctggcgTTTTgacaaac      |
| NotI/SnaBI_R | cagatccactattggcctattacgtaggatctgctgcggtaaagctc             |
| NotI/SnBI_F  | ggaagtcagcgcctgcaccattatgttccggatctgcatcgcagg               |
| TRP3_F       | ccagcacttttgcagtactaaccgcagatccaactcagaccactctagagg         |
| TRP3_R       | gcaacgtggggacaggccatggaactagtcggtaccctactcacccttctgctgtccag |
| Ace_DwChkR   | CTCCTTTGTTGGCGAAGATTCCG                                     |
| Ace_UpChkF   | GTTGTTTGACGGCGTTTGACAAG                                     |
| ARO34a_ChR   | gtcatggatggaacaggggcca                                      |
| aroG_ChkF    | tcaaaaatggcaccgcggtacga                                     |
| scARO7_ChkR  | ctcctactcaagctttgcaaacattctat                               |
| y ARO7_ChkF  | GATGTCATCAACAACCTGGCTCTTGATACTAA                            |
| RgTAL_ChkF   | gtgtcgctgatcgatcaacacttc                                    |
| VvSTS1_ChkR  | ggaacttctgcagtaataatctcttgacgaatg                           |
| VioC_ChkR    | cctggatcagcaccgacttgc                                       |
| VioD_ChkF    | tcatgaccctgagccacgacc                                       |
| y TRP3_ChkF  | tcggctacaacggagaggcc                                        |
| y TRP5_ChkR  | gaggcttgccctccagtgtactttc                                   |

---

**Table 3. Screening of high-performance strains**

| Strains                       | Clone numbers |         |        |         |        |        |
|-------------------------------|---------------|---------|--------|---------|--------|--------|
|                               | 1             | 2       | 3      | 4       | 5      | 6      |
| <b>2PE (mg/L)</b>             |               |         |        |         |        |        |
| YL0                           | 3.12          | 1.25    | 3.52   | 4.31    | 1.28   | 2.42   |
| YL1                           | 6.01          | 4.91    | 4.69   | 4.21    | 4.77   | 6.07   |
| YL2                           | 16.84         | 15.01   | 7.35   | 7.10    | 9.64   | 7.02   |
| YL3                           | 9.42          | 6.59    | 4.95   | 9.83    | 7.05   | 10.15  |
| YL4                           | 4.95          | 2.80    | 1.96   | 7.84    | 8.61   | 4.95   |
| YL5                           | 19.61         | 13.44   | 5.10   | 13.52   | 5.98   | 52.78  |
| YL6                           | 45.91         | 52.52   | 8.09   | 7.27    | 5.55   | 3.57   |
| YL7                           | 104.73        | 81.06   | 79.70  | 32.71   | 71.87  | 31.50  |
| YL8                           | 27.91         | 17.36   | 33.02  | 31.25   | 36.47  | 36.82  |
| YL9                           | 18.11         | 16.79   | 30.81  | 17.79   | 21.56  | 21.48  |
| YL10                          | 77.92         | 65.63   | 28.93  | 56.42   | 32.85  | 62.82  |
| YL11                          | 73.92         | 29.68   | 69.43  | 42.72   | 19.54  | 43.14  |
| YL12                          | 19.72         | 35.18   | 18.27  | 47.19   | 22.55  | 33.85  |
| YL13                          | 51.58         | 81.08   | 38.18  | 49.33   | 68.51  | 89.08  |
| YL14                          | 50.46         | 70.93   | 51.87  | 44.12   | 14.01  | 17.48  |
| YL15                          | 191.54        | 259.54  | 151.93 | 171.49  | 317.40 | 310.66 |
| YL16                          | 17.21         | 15.55   | 31.19  | 57.69   | 19.64  | 15.98  |
| YL17                          | 155.96        | 124.23  | 161.78 | 168.41  | 181.59 | 171.66 |
| YL21                          | 80.20         | 44.95   | 25.87  | 46.62   | 49.24  | 55.69  |
| YL22                          | 299.98        | 328.41  | 317.85 | 310.65  | 280.67 | 323.90 |
| YL23                          | 19.00         | 400.26  | 340.45 | 411.12  | 417.22 | 360.08 |
| YL25                          | 290.53        | 470.77  | 540.94 | 283.13  | 297.29 | 366.72 |
| YL26                          | 436.87        | 336.87  | 334.81 | 302.29  | 389.76 | 377.62 |
| YL27                          | 100.08        | 70.98   | 154.52 | 128.54  | 63.19  | 175.35 |
| YL28                          | 90.79         | 18.46   | 47.54  | 116.80  | 66.47  | 166.55 |
| YL29                          | 368.29        | 61.30   | 52.03  | 125.03  | 33.88  | 57.65  |
| YL30                          | 402.60        | 282.74  | 278.75 | 609.87  | 353.52 | 311.73 |
| YL32                          | 371.70        | 11.87   | 205.22 | 282.22  | 298.26 | 140.18 |
| YL34                          | 36.23         | 64.83   | 9.48   | 37.47   | 16.25  | 11.91  |
| YL35                          | 452.16        | 796.15  | 620.45 | 771.47  | 313.86 | 605.25 |
| YL36                          | 163.99        | 492.29  | 454.35 | 201.74  | 380.01 | 609.48 |
| YL37                          | 667.31        | 1156.35 | 853.28 | 418.57  | 247.00 | 768.40 |
| YL38                          | 741.23        | 102.09  | 939.73 | 1156.93 | 577.68 | 499.90 |
| <b>p-Coumaric acid (mg/L)</b> |               |         |        |         |        |        |
| YL39                          | 61.23         | 121.14  | 153.39 | 218.98  | 81.33  | 214.99 |
| YL40                          | 21.27         | 6.28    | 4.93   | 189.55  | 236.40 | 323.41 |
| <b>Resveratrol (mg/L)</b>     |               |         |        |         |        |        |
| YLRes                         | 8.39          | 3.54    | 2.36   | 7.31    | 5.93   | 2.54   |
| <b>Violacein (mg/L)</b>       |               |         |        |         |        |        |

---

|        |        |       |        |        |       |        |
|--------|--------|-------|--------|--------|-------|--------|
| YL41   | 69.18  | 59.85 | 169.91 | 15.48  | 53.98 | 202.04 |
| YL42   | 121.93 | 61.80 | 56.75  | 157.30 | 54.61 | 291.17 |
| po1fkV | 89.87  | 65.14 | 71     | 62     | 77.22 | 95.11  |

---

Data in red color indicates the highest production titer screened from the pooled yeast colonies.

## Supplementary Methods

### Integrative plasmid constructed in this work

Compared to *S. cerevisiae*, the genetic toolbox in *Y. lipolytica* is still less developed, due to the unclear genetic backgrounds and complexity of the non-homologous end joining mechanism (Lv, Marsafari et al. 2019). To overcome these limitations, we constructed three genomic integration plasmids, namely pUrLA, pUrLK, and pHyLD, to assemble and deposit very long gene fragments to the chromosome. Plasmid maps and sequence for pUrLA, pUrLK, and pHyLD have been appended in this supplementary file.

### Supplementary Notes

#### Note1. Deduction of the stoichiometry of 2PE biosynthesis and the theoretical yield calculation

For deducing the stoichiometry of 2PE biosynthesis by *de novo* pathway from glucose, we divided the 2PE synthesis pathway to three parts, including (i) glucose to PEP; (ii) glucose to E4P; and (iii) PEP and E4P to 2PE. According to the reactions annotated by KEGG (<https://www.kegg.jp/>), we got three stoichiometry equations:

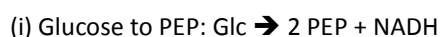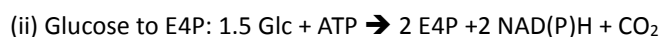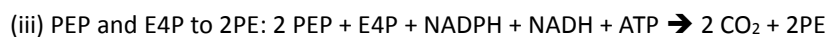

Thus, the stoichiometry of 2PE biosynthesis by De Novo pathway from glucose is  $(3.5 \text{ Glc} + 3 \text{ ATP} \rightarrow 5 \text{ CO}_2 + 2 \text{ 2PE})$ .

Subsequently, we established a global stoichiometric model of 2PE biosynthesis and assumed that production of 1 mol of 2PE needs  $x$  mol of glucose. Thus, the overall stoichiometrics will be:

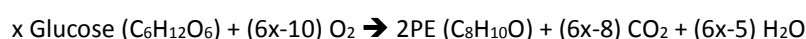

Thus, the yield of 2-PE (g/g<sub>glucose</sub>) is

$$Y_{2-PE} = \frac{122}{180x} \quad (1)$$

Furthermore, to assess the carbon conversion efficiency, we introduced the respiratory quotient (RQ):

$$\text{RQ} = \frac{6x-8}{6x-10} \quad (2)$$

Thus, the yield of 2-PE could be solved as

$$Y_{2-PE} = \frac{122}{180x} = \frac{122}{180} * \frac{3n-3}{5n-4} \quad (3)$$

As Shown in the metabolic model (SFigure1), the stoichiometrics (Eqn. 3) suggest that the theoretically maximum  $Y_{2-PE}$  is 0.4436 g/g<sub>glucose</sub>.

Supplementary Figures

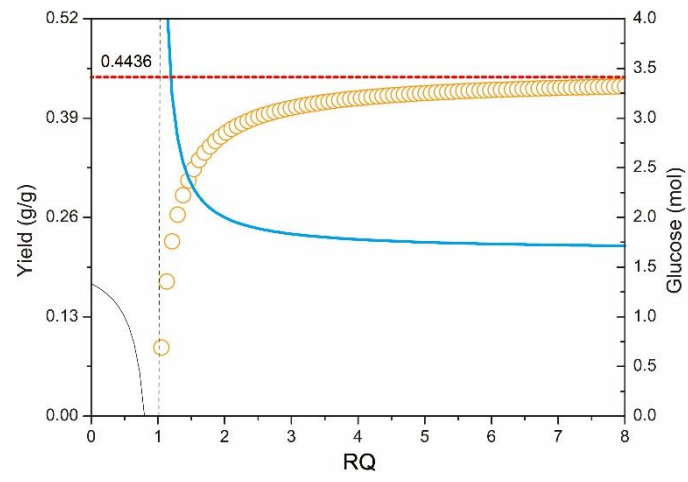

Figure S1. Mathematical models of 2-PE yield

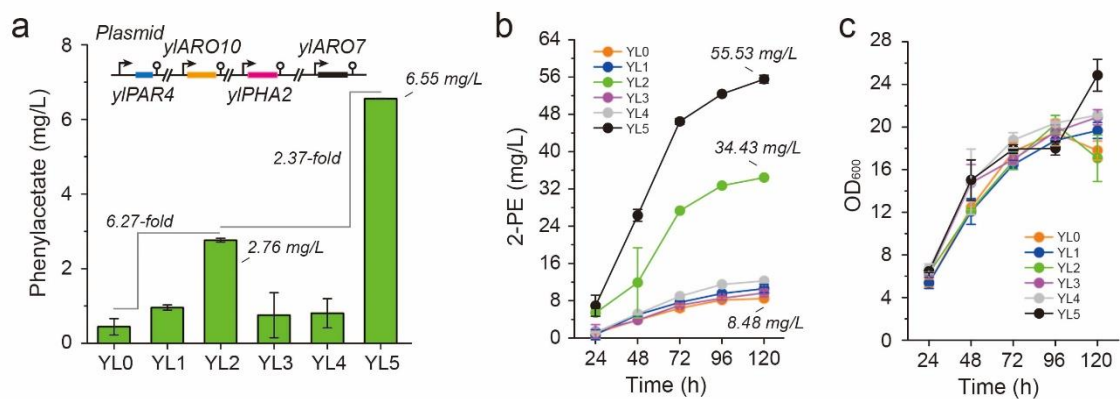

**Figure S2.** (a-c) Phenylacetate titer, time profiles of 2-PE titer and cell growth of strains carrying the 2-PE pathway, including genes *yIPAR4* (*YALIOD07062g*, encoding phenylacetaldehyde reductase), *yIARO10* (*YALIOD06930g*, encoding phenylpyruvate decarboxylase), *yIPHA2* (*YALIOB17336g*, encoding prephenate dehydratase) and *yIARO7* (*YALIOE17479g*, encoding chorismate mutase). All experiments were performed in triplicate and error bars represent standard deviations (SD).

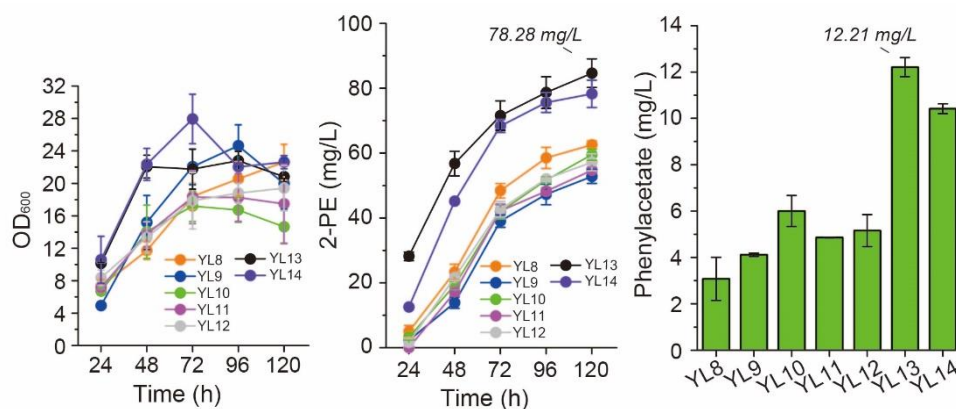

**Figure S3.** Phenylacetate, 2-PE and cell growth profile of strains overexpressing genes *yIARO1* (*YALIOF12639g*, encoding pentafunctional protein), *yIARO2* (*YALIOD17930g*, encoding bifunctional chorismate synthase), *yIARO3* (*YALIOB20020g*, encoding DAHP synthase), *yIARO4* (*YALIOB22440g*, encoding DAHP synthase), and *yIARO5* (*YALIOC06952g*, encoding DAHP synthase); All experiments were performed in triplicate and error bars represent standard deviations (SD).

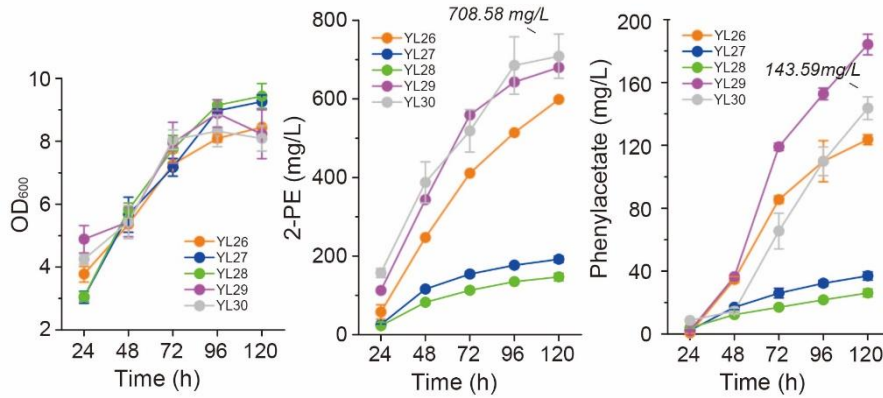

**Figure S4.** Time profiles of 2-PE, cell growth, and phenylacetate of strains overexpressing transketolase *yITKT*, phosphoketolases *BbxfpK* and *AcxpkA*; All experiments were performed in triplicate and error bars represent standard deviations (SD).

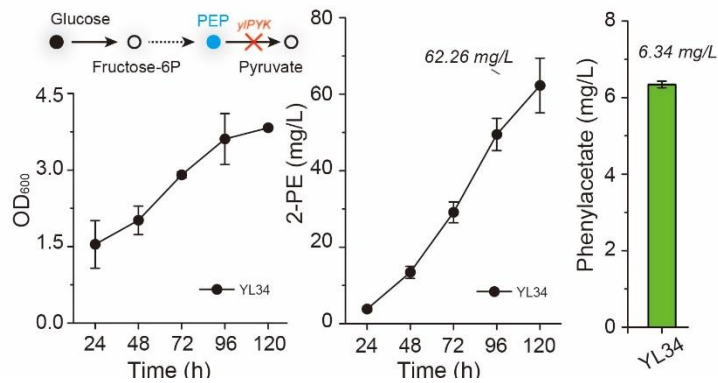

**Figure S5.** Time profile of 2-PE, cell growth, and phenylacetate of strains with pyruvate kinase *yIPYK* deletion in CSM medium with feeding of acetate. All experiments were performed in triplicate and error bars represent standard deviations (SD).

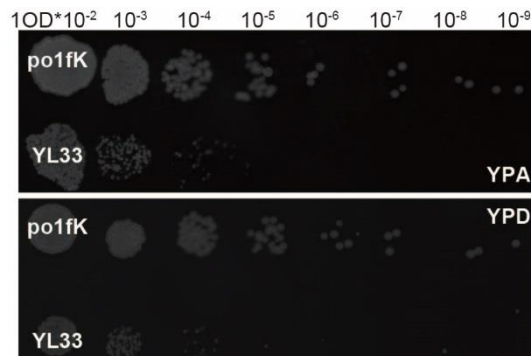

**Figure S6.** Cell growth on plate (24h) of *Y. lipolytica* with gene *yIPYK* deletion. *po1fK*, *po1fK Δku70::loxP*; *YL33*, *po1fK ΔyITYR1 ΔyITRP2 ΔyITRP3 ΔyIARO8 ΔyIARO9 ΔyIPYK yIARO1 yIARO2 yIARO3 yIARO4 yIARO5 scARO4K229L aroGS180F*

*y/TKT bbxfpK acxpk::loxP*; YPD medium, containing glucose 40.0 g/L, yeast extract 10.0 g/L, peptone 20.0 g/L; YPA medium, YPD with sodium acetate 5.0 g/L.

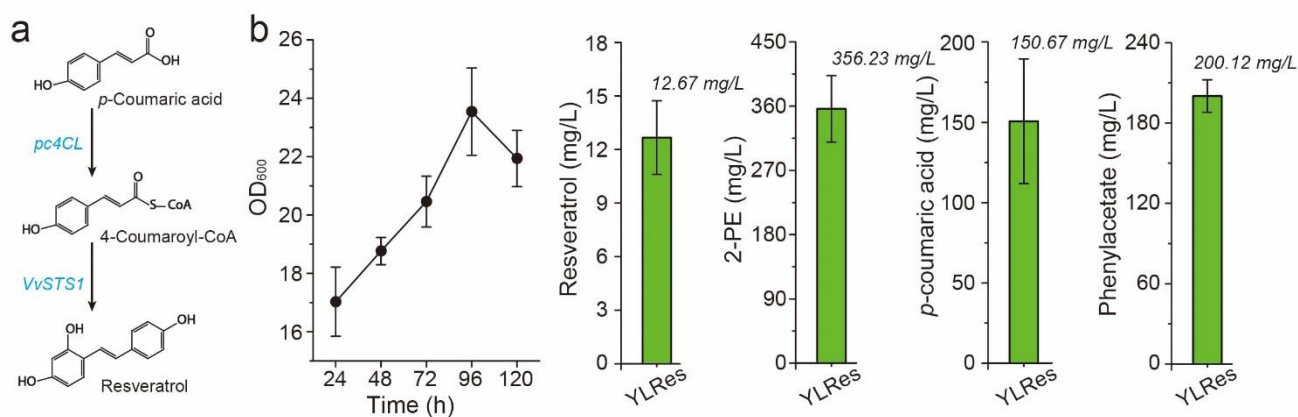

**Figure S7. Resveratrol production by strain YLRes.** (a) The catalytic steps form *p*-coumaric acid to resveratrol; *pc4CL*, 4-coumarate-CoA ligase from *Petroselinum crispum*; *VvSTS1*, resveratrol synthase from *Vitis vinifera*; (b) Cell growth, resveratrol titer, 2-PE titer, *p*-coumaric acid titer and phenylacetate titer of strain YLRes. All experiments were performed in triplicate and error bars show standard deviation (SD). All experiments were performed in triplicate and error bars represent standard deviations (SD).

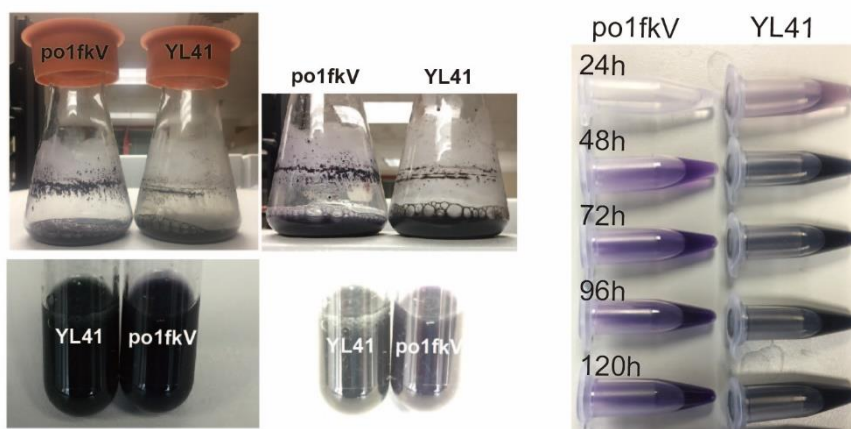

**Figure S8. Shaking flask cultivation and extraction of violacein produced by strains YL41 and *po1fkV*.** (a) Cell culture of shaking flask cultivation. The extraction process is that 0.20 mL of fermentation culture was mixed with 5-fold volume of ethyl acetate and appropriate glass beads, vortexed at 30 °C for 24 h.



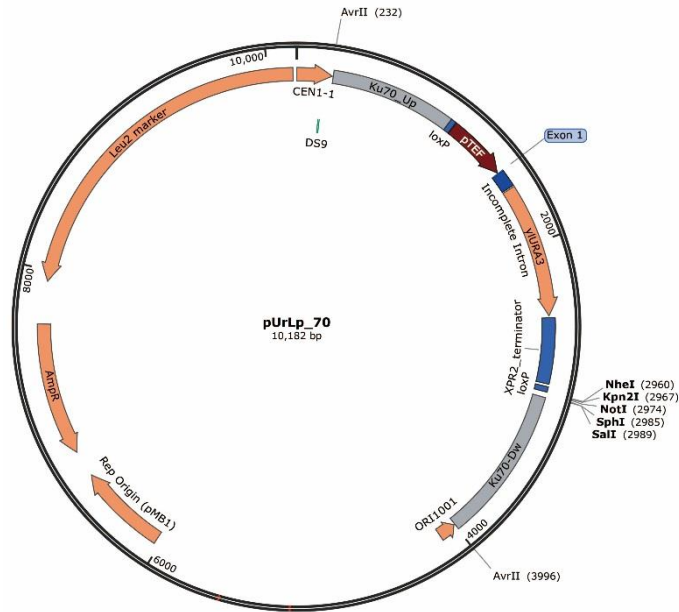

**Figure S9. Plasmid pUrLp70 map.** The multiple clone sites include *NheI*, *Kpn2I*, *NotI*, *SphI*, and *SallI*. After assembling the desired genes, the integration cassettes could be obtained by digested plasmid with enzyme *AvrII*.

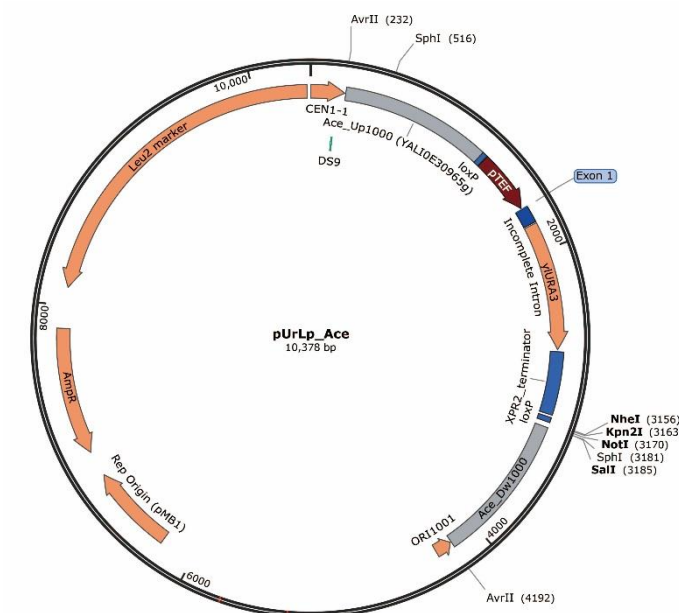

**Figure S10. Plasmid pUrLpAce map.** The multiple clone sites include *NheI*, *Kpn2I*, *NotI*, and *SallI*. After assembling the desired genes, the integration cassettes could be obtained by digested plasmid with enzyme *AvrII*.

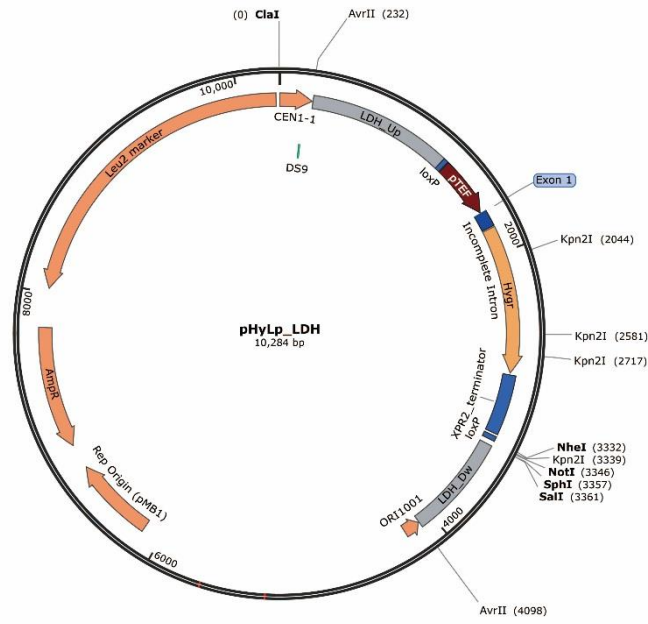

**Figure S11. Plasmid pUrLDH map.** The multiple clone sites include *NheI*, *NotI*, *SphI*, and *Sall*. After assembling the desired genes, the integration cassettes could be obtained by digested plasmid with enzyme *AvrII*.

## DNA Sequences

### Plasmid pUrLA sequences:

```
1      CGATGCTTTT CGTAGATAAT GGAATACAAA TGGATATCCA GAGTATACAC ATGGATAGTA
61     TACACTGACA CGACAATTCT GTATCTCTTT ATGTTAACTA CTGTGAGGCG TTAAATAGAG
121    CTTGATATAT AAAATGTTAC ATTTACACAGT CTGAACTTTT GCAGATTACC TAATTTGGTA
181    AGATATTAAT TATGAACTGA AAGTTGATGG CATCCCTAAA TTTGATGAAA GCCTAGGGAG
241    AACTGCTCCT GTGAATCTCT TAACGAACAC AGTCGCTCAA CCAATGTTGG TGATGAAGAT
301    GTCAAAAACA ACGCGGAGCC TACCCCGGAA GTGGGGGGTC AAACCTGAGA CAGATCGCGT
361    ACCGCTGCA TACCTGCAAT GCAACCATCA TGCTACTTGT AGTGTTCAG GGCCCGATGT
421    TCCACCGAAG CATTTTCATTG GTGGATCACC CACTAGTTTG AACTGGTATG ATCTCTGTTT
481    TTGTTTTGTC AATTGCATAA CCATGTTGGA GGGCCATGTT TATTTACCCC CCACGCCCT
541    GCTCTCACAG CTATTTTTCA GCCCGTGTCT CACACCGTCG GGGTGGTTTT AGTTTGCAT
601    TCAATTACTG CTGACCGGCG TGTTGTCGCC CACTCGCTAC TCAACACACC CACCGCCACT
661    GCTACACTGC GCCACTAGTC TGACGGATTG GCTTGCATTC CTCCAATATG TAGCTTACAA
721    CACGTTTTTA AGCGCCGTC CATATAATTA ATTTAATCTG CATTTTTCTA TCTCTCGCTT
781    GCCCGTAGTA TTACGTGAAT CAACTAGAAC ATATGGGGAG CTTCTGTTGC TGTTTCTCCA
841    ACTGCAATTA TGCTACTAC AAGTAGTATA TATTTGACCA ACCGGTATT GAACCCTACT
901    GGCTGTATTC TGGGGGAATA CATTGCATAG ATATGCACGT AAGTGGGGGT GTCTTTCTCG
961    CGCCATTGTA CTAAGAATGA CCCCACGTC TCATTCTGGG GCAACCAGAG TCACAGCGAA
1021   GGGATATATA GCTCAAGCTA GTCTTAAATA CACTCCTCT TTTCTGACAT TTGATCTTTC
1081   ACAACCGTCC TCGCTGAGCG CTTTGTACTT ACTGTAAGGG ACTCCTCTCT GTGCAACTCT
1141   ATTACTCACT CCGCAAGCCA CGAATCTACA ACTACCGATA CTCTGAATTG GCATAGGGTC
1201   TCTTTCATT CTTGATACAT TCACACATCC AGTTTCGCCA TAACTTCGTA TAGCATACAT
1261   TATACGAAGT TATGACGACA GAGACCGGGT TGGCGGCGCA TTTGTGTCCC AAAAAACAGC
1321   CCAATTGCC CCAATTGACC CCAAATTGAC CCAGTAGCGG GCCCAACCCC GCGGAGAGCC
1381   CCCTTCTCCC CACATATCAA ACCTCCCCCG GTTCCCACAC TTGCCGTTAA GGGCGTAGGG
1441   TACTGCAGTC TGGAACTAC GCTTGTTTCT ACTTTGACTT TGTTTCTTTG TCTGGCCATC
1501   CGGGTAACCC ATGCCGAGC CAAAATAGAC TACTGAAAAT TTTTTGCTT TGTGTTGGG
1561   ACTTTAGCCA AGGGTATAAA AGACCACCGT CCCCGAATTA CCTTCTCTCT TCTTTTCTCT
1621   CTCTCCTTGT CAACTCACAC CCGAAATCGT TAAGCATTTC CTTCTGAGTA TAAGAATCAT
1681   TCAAATCTAG AATGGTGAGT TTCAGAGGCA GCAGCAATTG CCACGGGCTT TGAGCACACG
1741   GCCGGTGTG GTCCCATTC CATCGACACA AGACGCCACG TCATCCGACC AGCACTTTTT
1801   GCAGTACTAA CCGCAGTAAC CGCAGAAAAA GCCTGAACTC ACCGCCACGT CTGTCGAGAA
1861   GTTCTGATC GAAAAGTTCG ACAGCGTCTC CGACCTGATG CAGCTCTCGG AGGGCGAAGA
1921   ATCTCGTGCT TTCAGCTTCG ATGTAGGAGG GCGTGGATAT GTCCTGCGGG TAAATAGCTG
1981   CGCCGATGGT TTCTACAAAG ATCGTTATGT TTATCGGCAC TTTGCATCGG CCGCGCTCCC
2041   GATTCCGGAA GTGCTTGACA TTGGGGAATT TAGCGAGAGC CTGACCTATT GCATCTCCCG
2101   CCGTGCACAG GGTGTCACGT TGCAAGACCT GCCTGAAACC GAACTGCCCG CTGTTCTGCA
2161   GCCGGTCGCG GAGGCCATGG ATGCGATCGC TGCGGCCGAT CTTAGCCAGA CGAGCGGGTT
2221   CGGCCCATTC GGACCGCAAG GAATCGGTCA ATACACTACA TGGCGTGATT TCATATGCGC
2281   GATTGCTGAT CCCCATGTGT ATCACTGGCA AACTGTGATG GACGACACCG TCAGTGCCTC
2341   CGTCGCGCAG GCTCTCGATG AGCTGATGCT TTGGGCCGAG GACTGCCCCG AAGTCCGGCA
2401   CCTCGTGCAC GCGGATTTTC GCTCCAACAA TGTCCTGACG GACAATGGCC GCATAACAGC
2461   GGTCAATTGAC TGGAGCGAGG CGATGTTCCG GGATTCCCAA TACGAGGTCG CCAACATCTT
```

2521 CTTCTGGAGG CCGTGGTTGG CTTGTATGGA GCAGCAGACG CGTACTTCG AGCGGAGGCA  
2581 TCCGGAGCTT GCAGGATCGC CGCGGCTCCG GCGGTATATG CTCCGCATTG GTCTTGACCA  
2641 ACTCTATCAG AGCTTGGTTG ACGGCAATTT CGATGATGCA GCTTGGGCGC AGGGTTCGATG  
2701 CGACGCAATC GTCCGATCCG GAGCCGGGAC TGTCGGGCGT ACACAAATCG CCCGCAGAAG  
2761 CGCGGCCGTC TGGACCGATG GCTGTGTAGA AGTACTCGCC GATAGTGGAA ACCGACGCC  
2821 CAGACTCGT CCGAGGGCAA AGGAATAGGG TACCGACTAG TTCCATGGCC TGTCCCCACG  
2881 TTGCCGGTCT TGCCTCCTAC TACCTGTCCA TCAATGACGA GGTTCTCACC CCTGCCCAGG  
2941 TCGAGGCTCT TATTACTGAG TCCAACACCG GTGTTCTTCC CACCACCAAC CTCAAGGGCT  
3001 CTCCCAACGC TGTTCCTAC AACGGTGTG GCATTTAGGC AATTAACAGA TAGTTTGCCG  
3061 GTGATAATTC TCTAACCTC CCACACTCCT TTGACATAAC GATTTATGTA ACGAAACTGA  
3121 AATTTGACCA GATATTGTG TAAATAGAAA ATCTGGCTTG TAGGTGGCAA AATGCGGCGT  
3181 CTTTGTTCAT CAATTCCCTC TGTGACTACT CGTCATCCCT TTATGTTCGA CTGTCGTATT  
3241 TCTTATTTTC CATACATATG CAAGTGAGAT GCCCGTGTCC GTTATCAAAT CTAGTTAATA  
3301 ACTTCGTATA GCATACATTA TACGAAGTTA TGCTAGCGTC CGGAGCGGCC GCGCATGCAA  
3361 GTCGACAACC TGCAAAGTCT CTCACGTACG TCTGTAATGA TACAAAATGT AAGCCTGAA  
3421 ATGTATGGGC TGCTGTATT CGTAAAATTA CAGTACTTGT ACGCCATATA TGGGGTCCAT  
3481 ATGTTGTTTA ACTATGTCAC CAATCTGAC AGTCATTCGA TCTAATTATG CAATTTGTAT  
3541 TCAAAGGGCA TGACTCCCTC TTTTCACTCA CTATTGTTTT TTATTATTAT TATATTTTTA  
3601 TAATTTGATT GCCATCCTGT CTGCACCTAT TCCAACACT GTATGTACTG TTCAAGTGCT  
3661 ACAAGTAGTA CGATACTGC ACTGTAAC TAAGTCCAAG TAGGTTTTGT GAGCTAAATT  
3721 GGACTCTATC CATAGACGAG TTTGTTGAGC GGCTATCGAC AGGAAAGTGT TACAGTGATG  
3781 TACTTGATG TACGTGTATC GTACTGTTTA GTAAACATAT ATATAGACAA CTGACACAC  
3841 CCAAATCAAT AGGCAATGAG GCTAGTTTCC ATTTATACAT CTCCGTGACC TTTGATTGTC  
3901 ATGTTGGACT GATAAGATGT GCACATTGAC GCGCCATAAA TGGATACTGG GTCCGAGATT  
3961 TATGCATCCC CCACATGTAT AGTCAACCTT AAGGGCAGGT CACATCTCCC ATCACCATCA  
4021 AATCTGACCA CAAAACAAT TGGATCTGAG CGATGATCCT CATCAAAAAT AAAGTGGCGC  
4081 TGAAGCTGCT ACAGCTACCT AGGTATGTCT GATAAAAGGA TGTAACATAG GCAAGCTGCT  
4141 CGTGAGTGTT GAGTACGAAC CTTAGATCCA AATCACCCGC ACCCACGGAT AACTTGCTT  
4201 GAATATACAG TAGTATGCTC GACCGATGCC CTTGAGAGCC TTCAACCCAG TCAGCTCCTT  
4261 CCGGTGGGCG CGGGGCATGA CTATCGTCGC CGCACTTATG ACTGTCTTCT TTATCATGCA  
4321 ACTCGTAGGA CAGGTGCCGG CAGCGCTCTG GGTCATTTTT GCGGAGGACC GCTTTCGCTG  
4381 GAGCGGACG ATGATCGGCC TGTCGCTTGC GGTATTCGGA ATCTTGACG CCCTCGCTCA  
4441 AGCCTTCGTC ACTGGTCCCG CCACCAAACG TTTCCGGCAG AAGCAGGCCA TTATCGCCGG  
4501 CATGGCGGCC GACGCGCTGG GCTACGTCTT GCTGGCGTTC GCGACGCGAG GCTGGATGGC  
4561 CTTCCCCATT ATGATTCTTC TCGCTTCCGG CGGCATCGGG ATGCCCGCGT TGCAGGCCAT  
4621 GCTGTCCAGG CAGGTAGATG ACGACCATCA GGGACAGCTT CAAGGATCGC TCGCGGCTCT  
4681 TACCAGCTA ACTTCGATCA CTGGACCGCT GATCGTCACG GCGATTTATG CCGCCTCGGC  
4741 GAGCACATGG AACGGTTGG CATGGATTGT AGGCGCCGCC CTATACCTTG TCTGCCTCCC  
4801 CGCGTTGCGT CGCGGTGCAT GGAGCCGGGC CACCTCGACC TGAATGGAAG CCGGCGGCAC  
4861 CTCGCTAACG GATTCACCAC TCCAAGAATT GGAGCCAATC AATTCTTGCG GAGAAGTGTG  
4921 AATGCGCAAA CCAACCCTTG GCAGAACATA TCCATCGCGT CCGCCATCTC CAGCAGCCGC  
4981 ACGCGGCGCA TCTCGGGCAG CGTTGGGTCC TGGCCACGGG TGCGCATGAT CGTGCTCCTG  
5041 TCGTTGAGGA CCCGGCTAGG CTGGCGGGGT TGCCTTACTG GTTAGCAGAA TGAATCACCG  
5101 ATACGCGAGC GAACGTGAAG CACTGCTGCG TGCAAAACGT CTGCGACCTG AGCAACAACA

5161 TGAATGGTCT TCGGTTTCCG TGTTTCGTAA AGTCTGGAAA CGCGGAAGTC AGCGCCCTGC  
5221 ACCATTATGT TTCGGATCTG CATCGCAGGA TGCTGCTGGC TACCCTGTGG AACACCTACA  
5281 TCTGTATTAA CGAAGCGCTG GCATTGACCC TGAGTGATTT TTCTCTGGTC CCGCCGCATC  
5341 CATAACGCCA GTTGTTTACC CTCACAACGT TCCAGTAACC GGGCATGTTC ATCATCAGTA  
5401 ACCCGTATCG TGAGCATCCT CTCTCGTTTC ATCGGTATCA TTACCCCAT GAACAGAAAT  
5461 CCCCTTACA CGGAGGCATC AGTGACAAA CAGGAAAAAA CCGCCCTAA CATGGCCCGC  
5521 TTTATCAGAA GCCAGACATT AACGCTTCTG GAGAACTCA ACGAGCTGGA CGCGGATGAA  
5581 CAGGCAGACA TCTGTGAATC GCTTACGAC CACGCTGATG AGCTTTACCG CAGCAGATCC  
5641 GCGGCCCAT AGGCCAATAG TGGATCTGCT GCCTCGCGC TTTCGGTGAT GACGGTAAAA  
5701 ACCTCTGACA CATGCAGCTC CCGGAGACGG TCACAGCTTG TCTGTAAGCG GATGCCGGGA  
5761 GCAGACAAGC CCGTCAGGGC GCGTCAGCGG GTGTTGGCGG GTGTCGGGGC GCAGCCATGA  
5821 CCCAGTCAG TAGCGATAGC GGAGTGATA CTGGCTTAAC TATGCGGCAT CAGAGCAGAT  
5881 TGTACTGAGA GTGCACCATA TGCGGTGTGA AATACCGCAC AGATGCGTAA GGAGAAAATA  
5941 CCGCATCAGG CGTCTTCCG CTTCCTCGCT CACTGACTCG CTGCGCTCGG TCGTTCCGGT  
6001 GCGGCGAGCG GTATCAGCTC ACTCAAAGGC GGTAATACGG TTATCCACAG AATCAGGGGA  
6061 TAACGCAGGA AAGAACATGT GAGCAAAAGG CCAGCAAAAG GCCAGGAACC GTAAAAAGGC  
6121 CGCGTTGCTG GCGTTTTTCC ATAGGCTCCG CCCCCTGAC GAGCATCACA AAAATCGACG  
6181 CTCAAGTCAG AGGTGGCGAA ACCCGACAGG ACTATAAAGA TACCAGGCGT TTCCCCTGG  
6241 AAGTCCCTC GTGCGCTCTC CTGTTCCGAC CCTGCCGCTT ACCGGATACC TGTCCGCCTT  
6301 TCTCCCTCG GGAAGCGTGG CGCTTCTCA TAGCTCACGC TGTAGGTATC TCAGTTCGGT  
6361 GTAGGTCGTT CGTCCAAGC TGGGCTGTGT GCACGAACCC CCCGTTGAGC CCGACCGCTG  
6421 CGCCTTATCC GGTAACATC GTCTTGAGTC CAACCCGGTA AGACACGACT TATCGCCACT  
6481 GGCAGCAGCC ACTGGTAACA GGATTAGCAG AGCGAGGTAT GTAGGCGGTG CTACAGAGTT  
6541 CTTGAAGTGG TGGCTAACT ACGGCTACAC TAGAAGGACA GTATTTGGTA TCTGCGCTCT  
6601 GCTGAAGCCA GTTACCTCG GAAAAAGAGT TGGTAGCTCT TGATCCGGCA AACAAACCAC  
6661 CGCTGGTAGC GGTGGTTTTT TTGTTTGCAA GCAGCAGATT ACGCGCAGAA AAAAAGGATC  
6721 TCAAGAAGAT CCTTTGATCT TTTCTACGGG GTCTGACGCT CAGTGGAAAG AAAACTCACG  
6781 TTAAGGGATT TTGGTCATGA GATTATCAAA AAGGATCTTC ACCTAGATCC TTTTAAATTA  
6841 AAAATGAAGT TTTAAATCAA TCTAAAGTAT ATATGAGTAA ACTTGGTCTG ACAGTTACCA  
6901 ATGCTTAATC AGTGAGGCAC CTATCTCAGC GATCTGTCTA TTTCGTTTAT CCATAGTTGC  
6961 CTGACTCCC GTCGTGTAGA TAACTACGAT ACGGGAGGGC TTACCATCTG GCCCCAGTGC  
7021 TGCAATGATA CCGCGAGACC CACGCTCACC GGCTCCAGAT TTATCAGCAA TAAACCAGCC  
7081 AGCCGGAAGG GCCGAGCGCA GAAGTGGTCC TGCAACTTTA TCCGCCTCCA TCCAGTCTAT  
7141 TAATTGTTGC CGGGAAGCTA GAGTAAGTAG TTCGCCAGTT AATAGTTTGC GCAACGTTGT  
7201 TGCCATTGCT GCAGGCATCG TGGTGTACG CTCGTCGTTT GGTATGGCTT CATTGAGTCT  
7261 CGGTTCCCAA CGATCAAGGC GAGTTACATG ATCCCCATG TTGTGCAAAA AAGCGGTTAG  
7321 CTCCTTCGGT CCTCCGATCG TTGTCAGAAG TAAGTTGGCC GCAGTGTAT CACTCATGGT  
7381 TATGGCAGCA CTGCATAATT CTCTACTGT CATGCCATCC GTAAGATGCT TTTCTGTGAC  
7441 TGGTGAGTAC TCAACCAAGT CATTCTGAGA ATAGTGATG CGGCGACCGA GTTGCTCTTG  
7501 CCCGGCGTCA ACACGGGATA ATACCGCGCC ACATAGCAGA ACTTTAAAAG TGCTCATCAT  
7561 TGGAAAACGT TCTTCGGGGC GAAAACTCTC AAGGATCTTA CCGCTGTGTA GATCCAGTTC  
7621 GATGTAACCC ACTCGTGAC CCAACTGATC TTCAGCATCT TTTACTTTCA CCAGCGTTTC  
7681 TGGGTGAGCA AAAACAGGAA GGCAAAATGC CGCAAAAAG GGAATAAGGG CGACACGGAA  
7741 ATGTTGAATA CTCATACTCT TCCTTTTTCA ATATTATTGA AGCATTATC AGGGTTATTG

7801 TCTCATGAGC GGATACATAT TTGAATGTAT TTAGAAAAAT AAACAAATAG GGGTTCCGCG  
7861 CACATTTCCC CGAAAAGTGC CACCTGACGT CTAAGAAACC ATTATTATCA TGACATTAAC  
7921 CTATAAAAAAT AGGCGTATCA CGAGGCCCTT TCGTCTTCAA GAATTCATGT CACACAAACC  
7981 GATCTTCGCC TCAAGGAAAC CTAATTCTAC ATCCGAGAGA CTGCCGAGAT CTGTTCCGAA  
8041 ATCAACGGAT GCTCAACCGA TTTCGACAGT AATAATTTGA ATCGAATCGG AGCCTAAAAAT  
8101 GAACCCGAGT ATATCTCATA AAATTCTCGG TGAGAGGTCT GTGACTGTCA GTACAAGGTG  
8161 CCTTCATTAT GCCCTCAACC TTACCATAACC TCACTGAATG TAGTGTACCT CTAAAAATGA  
8221 AATACAGTGC CAAAAGCCAT GGCCTGAGC TCGTCTAACG GACTTGATAT ACAACCAATT  
8281 AAAACAAATG AAAAGAAATA CAGTCTTTG TATCATTTGT AACAATTACC CTGTACAAAC  
8341 TAAGGTATTG AAATCCCACA ATATTCCCAA AGTCCACCCC TTTCCAAATT GTCATGCCTA  
8401 CAACTCATAT ACCAAGCACT AACCTACCAA ACACCACTAA AACCCACAA AATATATCTT  
8461 ACCGAATATA CAGTAACAAG CTACCACCAC ACTCGTTGGG TGCAGTCGCC AGCTTAAAGA  
8521 TATCTATCCA CATCAGCCAC AACTCCCTC CTTTAATAAA CCGACTACAC CCTTGGCTAT  
8581 TGAGGTTATG AGTGAATATA CTGTAGACAA GACACTTTCA AGAAGACTGT TTCCAAAACG  
8641 TACCACTGTC CTCCACTACA AACACACCCA ATCTGCTTCT TCTAGTCAAG GTTGCTACAC  
8701 CGGTAAATTA TAAATCATCA TTTCATTAGC AGGGCAGGGC CCTTTTTATA GAGTCTTATA  
8761 CACTAGCGGA CCCTGCCGGT AGACCAACCC GCAGGCGCGT CAGTTTGCTC CTCCATCAA  
8821 TGCGTCGTAG AAACGACTTA CTCCTTCTTG AGCAGCTCCT TGACCTGTT GGCAACAAGT  
8881 CTCCGACCTC GGAGGTGGAG GAAGAGCCTC CGATATCGGC GGTAGTGATA CCAGCCTCGA  
8941 CGGACTCCTT GACGGCAGCC TCAACAGCGT CACCGCGGG CTTTATGTTA AGAGAGAACT  
9001 TGAGCATCAT GGCAGCAGAC AGAATGGTGG CAATGGGGTT GACCTTCTGC TTGCCGAGAT  
9061 CGGGGGCAGA TCCGTGACAG GGCTCGTACA GACCGAACGC CTCGTTGGTG TCGGGCAGAG  
9121 AAGCCAGAGA GGCAGAGGGC AGCAGACCCA GAGAACGGG GATGACGGAG GCCTCGTCGG  
9181 AGATGATATC GCCAAACATG TTGGTGGTGA TGATGATACC ATTCATCTTG GAGGGCTGCT  
9241 TGATGAGGAT CATGGCGGCC GAGTCGATCA GCTGGTGGTT GAGCTCGAGC TGGGGGAATT  
9301 CGTCCTTGAG GACTCGAGTG ACAGTCTTTC GCCAAAGTCG AGAGGAGGCC AGCACGTTGG  
9361 CCTTGTC AAG ACCACAG GGAAGAGGGG GGTGTGCTG AAGGGCCAGG AAGGCGCCA  
9421 TTCGGGCAAT TCGCTCAACC TCAGGAACGG AGTAGGTCTC GGTGTCGGAA GCGACGCCAG  
9481 ATCCGTCATC CTCCTTTCGC TCTCCAAAGT AGATACCTCC GACGAGCTCT CGGACAATGA  
9541 TGAAGTCGGT GCCCTCAACG TTTCGGATGG GGGAGAGATC GGCAGCTTG GGCAGACGCA  
9601 GCTGGCAGGG TCGCAGGTTG GCGTACAGGT TCAGGTCCTT TCGCAGCTTG AGGAGACCTT  
9661 GCTCGGGTCG CACGTCGGTT CGTCCGTCGG GAGTGGTCCA TACGGTGTG GCAGCGCCTC  
9721 CGACAGCACC GAGCATAATA GAGTCAGCCT TTCGGCAGAT GTCGAGAGTA GCGTCGGTGA  
9781 TGGGCTCGCC CTCCTTCTCA ATGGCAGCTC CTCCAATGAG TCGGTCCTCG AACACAAACT  
9841 CGGTGCCGGA GGCCTCAGCA ACAGACTTGA GCACCTTGAC GGCCTCGCA ATCACCTCGG  
9901 GGCCACAGAA GTCGCCCGC AGAAGAACAA TCTTCTGGA GTCAGTCTTG GTCTTCTTAG  
9961 TTTCGGGTTT CATTGTGGAT GTGTGTGGTT GTATGTGTA TGTGGTGTG GGAGTAAAAA  
10021 TCTGTGGCTG GCAAACGCTC TTGTATATAT ACGCACTTTT GCCCGTGCTA TGTGGAAGAC  
10081 TAAACCTCCG AAGATTGTGA CTCAGGTAGT GCGGTATCGG CTAGGGACCC AAACCTTGTC  
10141 GATGCCGATA GCGCTATCGA ACGTACCCAG CCGGCCGGGA GTATGTCGGA GGGGACATAC  
10201 GAGATCGTCA AGGGTTTGTG GCCAACTGGT AAATAAATGA TGACTCAGGC GACGACGGAA  
10261 TTCTCATGTT TGACAGCTTA TCAT

Plasmid pUrLK sequences:

1 CGATGCTTTT CGTAGATAAT GGAATACAAA TGGATATCCA GAGTATACAC ATGGATAGTA  
61 TACTACTGACA CGACAATTCT GTATCTCTTT ATGTAACTA CTGTGAGGCG TAAATAGAG  
121 CTTGATATAT AAAATGTTAC ATTTACAGT CTGAACTTTT GCAGATTACC TAATTTGGTA  
181 AGATATTAAT TATGAACTGA AAGTTGATGG CATCCCTAAA TTTGATGAAA GCCTAGGCGA  
241 CTTGATGTTT AGAGTGTCCA GATCCGCAAG ATCGGCTCGC ACTTGTGTTG TGTTGTTTCA  
301 AATCAGCCTG TCGTTTTGTG TCGTTTGAGA TCATTCTGTC TCACTCTTAG GCTCGCTTAG  
361 AACCGACAAC GGAGAATCCG GGCTCGGTTT TTCGGTCGGC CTTGATCTGG GCCTTGGACT  
421 TGTACTGGTC GGCCATCTCC ACGTTGACCA GCTCCTTGAC CTTGTAGAGC TGACCGGCGA  
481 TACCAGGAGA CACCTTGTAG TACTTCTGGG AGCCGACCTT GCCCAGACCG AGGGTCTTGA  
541 GCACGTCACG TGTTCCTCCAC GGCATTCGCA GGATAGATCG GACCTGTGTG ACTTTGTAGA  
601 ACATGGCGTT TCAGGTGGTT GCGTGAGTGT GTAAAATCGT GTCTTTCAGA AGTTACAAAT  
661 TTCACCGCAT TTAGAGTTTA TGCAGATGGG CGGTGTGTGG TTGGGAGTTC GATTTCCGTG  
721 CGTGCATTG ATCTTGATGA ATTGGATTG TACATGAGGA AGAGCACGTC AAGCACCGCC  
781 TACTGCAAAC TCGTGAATAT TGAGATTATT GAGGAAATTC AAGGAAAATT CAGATCAGAT  
841 TTGAGAGCAA AGTCCAACAA TACTACACAA TCCCTTCTCT GTATTCTTCC ACCATCGTCA  
901 TCGTCGTCTG TCTTCTCTTC AGCTTTTTAA TTTCACTCCC CACAAACCCA AATTTAGCTG  
961 CATCATTCAT CAACCTCCAA TTATAACTAT ACATCGCGAC ACGAACACGA AACACGAACC  
1021 ACGAACC GCC TTTTTGAA AATAA CTTCG TATAGCATA ATTATACGAA GTTATGACGA  
1081 CAGAGACCGG GTTGGCGGCG CATTGTGTG CCAAAAAACA GCCCAATTG CCCCAATTGA  
1141 CCCCAAATTG ACCCAGTAGC GGGCCCAACC CCGGCGAGAG CCCCTTCTC CCCACATATC  
1201 AAACCTCCC CGGTTCCAC ACTTGCCGTT AAGGGCGTAG GGTACTGCAG TCTGGAATCT  
1261 ACGCTTGTT CAGACTTTGTA CTGTGTTCTT TGTCTGGCA TCCGGGTAAC CCATGCCGGA  
1321 CGCAAATAG ACTACTGAAA ATTTTTTGC TTTGTGGTTG GGACTTTAGC CAAGGTATA  
1381 AAAGACCACC GTCCCGAAT TACCTTCTCT CTTCTTTCT CTCTCTCCT GTCAACTCAC  
1441 ACCCGAAATC GTTAAGCATT TCCTTCTGAG TATAAGAATC ATTCAAATCT AGAATGGTGA  
1501 GTTTCAGAGG CAGCAGCAAT TGCCACGGC TTTGAGCACA CGGCCGGGTG TGGTCCCATT  
1561 CCCATCGACA CAAGACGCCA CGTCATCCGA CCAGCACTTT TTGAGTACT AACCGCAGCC  
1621 CTCCTACGAA GCTCGAGCTA ACGTCCACAA GTCCGCTTT GCCGCTCGAG TGCTCAAGCT  
1681 CGTGGCAGCC AAGAAAACCA ACCTGTGTG TTCTCTGGAT GTTACCACCA CCAAGGAGCT  
1741 CATTGAGCTT GCCGATAAGG TCGGACCTTA TGTGTGCATG ATCAAGACCC ATATCGACAT  
1801 CATTGACGAC TTCACCTACG CCGGCACTGT GCTCCCCTC AAGGAACTTG CTCTTAAGCA  
1861 CGGTTTCTTC CTGTTGAGG ACAGAAAGTT CGCAGATATT GGCAACTG TCAAGACCA  
1921 GTACAAGAAC GGTGTCTACC GAATCGCCGA GTGGTCCGAT ATCACCACG CCCACGGTGT  
1981 ACCCGAACC GGAATCATTG CTGGCTGCG AGCTGGTGCC GAGGAACTG TCTCTGAACA  
2041 GAAGAAGGAG GACGTCTCTG ACTACGAGAA CTCCCAGTAC AAGGAGTCC TGGTCCCCTC  
2101 TCCAACGAG AAGCTGGCCA GAGGTCTGCT CATGCTGGCC GAGCTGTCTT GCAAGGGCTC  
2161 TCTGGCCACT GGCAGTACT CCAAGCAGAC CATTGAGCTT GCCCGATCCG ACCCCGAGTT  
2221 TGTGGTTGGC TTCATTGCCC AGAACCAGC TAAGGGCGAC TCTGAGGACT GGCTTATTCT  
2281 GACCCCGGG GTGGTCTTG ACGACAAGG AGACGCTCTC GGACAGCAGT ACCGAACTGT  
2341 TGAGGATGTC ATGTCTACCG GAACGGATAT CATAATTGTC GGCCGAGGTC TGACGGCCA  
2401 GAACCGAGAT CCTATTGAGG AGGCCAAGCG ATACCAGAAG GCTGGCTGGG AGGCTTACCA  
2461 GAAGATTAAC TGTTAGGGTA CCGACTAGTT CCATGGCCTG TCCCACGTT GCCGGTCTTG  
2521 CCTCCTACTA CCTGTCCATC AATGACGAGG TTCTACCCC TGCCCAGGTC GAGGCTCTTA  
2581 TTACTGAGTC CAACACCGGT GTTCTTCCA CCACCAACCT CAAGGGCTCT CCCAACGCTG

2641 TTGCCTACAA CGGTGTTGGC ATTTAGGCAA TTAACAGATA GTTTGCCGGT GATAATTCTC  
2701 TTAACCTCCC ACACTCCTTT GACATAACGA TTTATGTAAC GAAACTGAAA TTTGACCAGA  
2761 TATTGTTGTA AATAGAAAAT CTGGCTTGTA GGTGGCAAAA TGCGGCGTCT TTGTTTCATCA  
2821 ATTCCCTCTG TGACTACTCG TCATCCCTTT ATGTTGCGACT GTCGTATTTT TTATTTTCCA  
2881 TACATATGCA AGTGAGATGC CCGTGTCCGT TATCAAATCT AGTTAATAAC TTCGTATAGC  
2941 ATACATTATA CGAAGTTATG CTAGCGTCCG GAGCGGCCGC GCATGCAAGT CGACACTAGG  
3001 GAGGCACATC TAAACGAATA ACGAATATTA ATGATACCAT CATATCTCAG AACATGTATG  
3061 ACTGCTGCTT CCAAACGATA TGAGGATGAG TCCTCTTTCA GATTAAGATA GAGTACAAAT  
3121 ATATTATCTA TATACTGGTG TCTGTGCGAT GTCGTATGAG CCGTGAATCA TGTGACTGTC  
3181 ACGTGGTTTG GCCCAAGTTA CACCGTAGCT ACGCCTTTCT TGACCGTCTC CATGGTCTTC  
3241 TGGGCGGGTT GACAGTTTCC ACTGGATGAG CGTCCGCTC CTGTTCTGTG CGTTGTCCCT  
3301 GCAGCTCAGC CTCAATCTTC TGACCGAGCT CGGAGTCCAG GGAAATGCCA ACAGGTTGTC  
3361 CAAGCAACAT CATGGTTTGG TGGGCGCCG TGATCTCATC GTCGTTGGAT ACCATTCGGT  
3421 ACTTGGCCTC AATCTGCACA AAGTAGCGGT ACCACTGGTT TCGAGCAAAC CGCTCCAATT  
3481 GAGCCTCTCC GTCGAGAGAG AGAGTAGGTG ATTGCTCCAA CTTGCGGCCA AAATGAAGTT  
3541 CTCGACTCAC CTTTTGAAG CGGTCTTCT TGCCCATCTT GGTGGCGAAA GTAGTGGCTA  
3601 GTGGTGGATG ACTTTGTATA ATGTACCGAT GAAGAGGGTT GTATTTGCTC AGTAAGAAGT  
3661 AGCGAGTGAA ATCAGATGAC TTAACGAGAG CAAAGGGCAA TGGAATACCT GCTGCCTGAT  
3721 TAACAACAGC TTCTGTGTCG TTTCTCTCTT GTGAATGAGT GTGTTGCTAG AGGTAGGTTG  
3781 GCACTCCAAT GTTACGACAC ACAATAGTCT ATAGAGCACT ACAAAGGGCT ATATCGTCAA  
3841 CTGCTCTATT GTAGCTACAG TACAGTACAT ACCATCAAGT GAACAATGGA CCACCAAACCT  
3901 CGGCACTAAG CCAATAGAAC CTTTGCGGCC TCCTTTATCA CGTTTCTATA TACCTTGTC  
3961 ATTTATGTGC CACCCTTTAG TCTTGGTCTG TCACTCCTAG GTATGTCTGA TAAAAGGATG  
4021 TAACATAGGC AAGCTGCTCG TGAGTGTTGA GTACGAACCT TAGATCCAAA TCACCCGCAC  
4081 CCACGGATAT ACTTGCTTGA ATATACAGTA GTATGCTCGA CCGATGCCCT TGAGAGCCTT  
4141 CAACCCAGTC AGCTCCTTCC GGTGGGCGCG GGGCATGACT ATCGTCGCG CACTTATGAC  
4201 TGTCTTCTTT ATCATGCAAC TCGTAGGACA GGTGCCGGCA GCGCTCTGGG TCATTTTCGG  
4261 CGAGGACCGC TTTGCTGGA GCGCGACGAT GATCGGCCTG TCGCTTGGG TATTCGGAAT  
4321 CTTGCACGCC CTCGCTCAAG CCTTCGTCAC TGGTCCCGCC ACCAAACGTT TCGGCGAGAA  
4381 GCAGGCCATT ATCGCCGGCA TGGCGGCCGA CGCGCTGGGC TACGTCTTGC TGGCGTTCCG  
4441 GACGCGAGGC TGGATGGCCT TCCCATTAT GATTCTTCTC GCTTCCGGCG GCATCGGGAT  
4501 GCCCGCGTTG CAGGCCATGC TGTCAGGCA GGTAGATGAC GACCATCAGG GACAGCTTCA  
4561 AGGATCGCTC GCGGCTCTTA CCAGCCTAAC TTCGATCACT GGACCGCTGA TCGTCACGGC  
4621 GATTTATGCC GCCTCGGCGA GCACATGGAA CGGGTTGGCA TGGATTGTAG GCGCCGCCCT  
4681 ATACCTTGTC TGCTCCCCG CGTTGCGTCTG CGGTGCATGG AGCCGGGCCA CCTCGACCTG  
4741 AATGGAAGCC GGCAGCACCT CGCTAACGGA TTCACCACTC CAAGAATTGG AGCCAATCAA  
4801 TTCTTGGGGA GAACTGTGAA TGCGCAAACC AACCTTGGC AGAACATATC CATCGCGTCC  
4861 GCCATCTCCA GCAGCCGCAC GCGGCGCATC TCGGGCAGCG TTGGGTCCTG GCCACGGGTG  
4921 CGCATGATCG TGCTCCTGTC GTTGAAGACC CGGCTAGGCT GCGGGGTTG CCTTACTGGT  
4981 TAGCAGAATG AATCACCGAT ACGCGAGCGA ACGTGAAGCG ACTGCTGCTG CAAAACGTCT  
5041 GCGACCTGAG CAACAACATG AATGGTCTTC GGTTCCTGTG TTTGTAAG TCTGAAACG  
5101 CGGAAGTCAG CGCCCTGCAC CATTATGTTT CGGATCTGCA TCGCAGGATG CTGCTGGCTA  
5161 CCCTGTGGAA CACCTACATC TGTATTAACG AAGCGCTGGC ATTGACCCTG AGTGATTTT  
5221 CTCTGGTCCC GCCGCATCCA TACCGCCAGT TGTTTACCCT CACAACGTT CAGTAACCGG



5281 GCATGTTTCAT CATCAGTAAC CCGTATCGTG AGCATCCTCT CTCGTTTCAT CGGTATCATT  
5341 ACCCCCATGA ACAGAAATCC CCCTTACACG GAGGCATCAG TGACCAAACA GGAAAAAACC  
5401 GCCCTTAACA TGGCCCGCTT TATCAGAAGC CAGACATTAA CGCTTCTGGA GAAACTCAAC  
5461 GAGCTGGACG CCGATGAACA GGCAGACATC TGTGAATCGC TTCACGACCA CGCTGATGAG  
5521 CTTTACCGCA GCAGATCCGC GGCCCATAG GCCAATAGTG GATCTGCTGC CTCGCGCGTT  
5581 TCGGTGATGA CCGTGAAAAC CTCTGACACA TGCAGCTCCC GGAGACGGTC ACAGCTTGTC  
5641 TGTAAGCGGA TGCCGGGAGC AGACAAGCCC GTCAGGGCGC GTCAGCGGGT GTTGGCGGGT  
5701 GTCGGGGCGC AGCCATGACC CAGTCACGTA GCGATAGCGG AGTGTATACT GGCTTAACTA  
5761 TGCGGCATCA GAGCAGATTG TACTGAGAGT GCACCATATG CCGTGTGAAA TACCGCACAG  
5821 ATGCGTAAGG AGAAAATACC GCATCAGGCG CTCTTCGCT TCCTCGCTCA CTGACTCGCT  
5881 GCGCTCGGTC GTTCGGCTGC GCGGAGCGGT ATCAGCTCAC TCAAAGGCGG TAATACGGTT  
5941 ATCCACAGAA TCAGGGGATA ACGCAGGAAA GAACATGTGA GCAAAAGGCC AGCAAAAGGC  
6001 CAGGAACCGT AAAAAGGCCG CGTTGCTGGC GTTTTTCCAT AGGCTCCGCC CCCCTGACGA  
6061 GCATCACAAA AATCGACGCT CAAGTCAGAG GTGGCGAAAC CCGACAGGAC TATAAAGATA  
6121 CCAGGCGTTT CCCCTTGAA GCTCCCTCGT GCGCTCTCCT GTTCCGACCC TGCCGCTTAC  
6181 CGGATACCTG TCCGCCTTTC TCCCTTCGGG AAGCGTGGCG CTTTCTCATA GCTCACGCTG  
6241 TAGGTATCTC AGTTCGGTGT AGGTCGTTTC CTCCAAGCTG GGCTGTGTGC ACGAACCCCC  
6301 CGTTCAGCCC GACCGCTGCG CCTTATCCGG TAACTATCGT CTTGAGTCCA ACCCGGTAAG  
6361 ACACGACTTA TCGCCACTGG CAGCAGCCAC TGGTAACAGG ATTAGCAGAG CGAGGTATGT  
6421 AGGCGGTGCT ACAGAGTTCT TGAAGTGGTG GCCTAACTAC GGCTACACTA GAAGGACAGT  
6481 ATTTGGTATC TGCCTCTGCG TGAAGCCAGT TACCTTCGGA AAAAGAGTTG GTAGCTCTTG  
6541 ATCCGGCAAA CAAACCACCG CTGGTAGCGG TGGTTTTTTT GTTTGCAAGC AGCAGATTAC  
6601 GCGCAGAAAA AAAGGATCTC AAGAAGATCC TTTGATCTTT TCTACGGGGT CTGACGCTCA  
6661 GTGGAACGAA AACTCACGTT AAGGGATTTT GGTCAATGAGA TTATCAAAAA GGATCTTCAC  
6721 CTAGATCCTT TAAATTAATA AATGAAGTTT TAAATCAATC TAAAGTATAT ATGAGTAAAC  
6781 TTGGTCTGAC AGTTACCAAT GCTTAATCAG TGAGGCACCT ATCTCAGCGA TCTGTCTATT  
6841 TCGTTCATCC ATAGTTGCCT GACTCCCCGT CGTGTAGATA ACTACGATAC GGGAGGGCTT  
6901 ACCATCTGGC CCCAGTGCTG CAATGATACC GCGAGACCCA CGCTCACCGG CTCCAGATTT  
6961 ATCAGCAATA AACCAGCCAG CCGAAGGGC CGAGCGCAGA AGTGGTCCTG CAACTTTATC  
7021 CGCCTCCATC CAGTCTATTA ATTGTTGCCG GGAAGCTAGA GTAAGTAGTT CGCCAGTTAA  
7081 TAGTTTGCGC AACGTTGTG CCATTGCTGC AGGCATCGTG GTGTCACGCT CGTCGTTTGG  
7141 TATGGCTTCA TTCAGCTCCG GTTCCCAACG ATCAAGGCGA GTTACATGAT CCCCATGTT  
7201 GTGCAAAAAA GCGGTTAGCT CCTTCGGTCC TCCGATCGTT GTCAGAAGTA AGTTGGCCGC  
7261 AGTGTTATCA CTCATGGTTA TGGCAGCACT GCATAATTCT CTTACTGTCA TGCCATCCGT  
7321 AAGATGCTTT TCTGTGACTG GTGAGTACTC AACCAAGTCA TTCTGAGAAT AGTGTATGCG  
7381 GCGACCGAGT TGCTCTTGCC CGGCGTCAAC ACGGGATAAT ACCGCGCCAC ATAGCAGAAC  
7441 TTTAAAAGTG CTCATCATTG GAAAACGTTT TTCGGGGCGA AAACCTCTCA GGATCTTACC  
7501 GCTGTTGAGA TCCAGTTCGA TGTAACCCAC TCGTGCACCC AACTGATCTT CAGCATCTTT  
7561 TACTTTCACC AGCGTTTCTG GGTGAGCAAA AACAGGAAGG CAAAATGCCG CAAAAAAGGG  
7621 AATAAGGGCG ACACGGAAAT GTTGAATACT CATACTCTTC CTTTTTCAAT ATTATTGAAG  
7681 CATTATCAG GGTATTGTC TCATGAGCGG ATACATATTT GAATGTATTT AGAAAAATAA  
7741 ACAAATAGGG GTTCCGCGCA CATTTCCTCC AAAAGTGCCA CCTGACGTCT AAGAAACCAT  
7801 TATTATCATG ACATTAACCT ATAAAAATAG GCGTATCACG AGGCCCTTTC GTCTTCAAGA  
7861 ATTCATGTCA CACAAACCGA TCTTCGCCTC AAGGAAACCT AATTCTACAT CCGAGAGACT

7921 GCCGAGATCT GTTCGAAAT CAACGGATGC TCAACCGATT TCGACAGTAA TAATTTGAAT  
7981 CGAATCGGAG CCTAAAATGA ACCCGAGTAT ATCTCATAAA ATTCTCGGTG AGAGGTCTGT  
8041 GACTGTCAGT ACAAGGTGCC TTCATTATGC CCTCAACCTT ACCATACCTC ACTGAATGTA  
8101 GTGTACCTCT AAAAATGAAA TACAGTGCCA AAAGCCATGG CACTGAGCTC GTCTAACGGA  
8161 CTTGATATAC AACCAATTA AACAAATGAA AAGAAATACA GTTCTTTGTA TCATTTGTAA  
8221 CAATTACCCT GTACAAACTA AGGTATTGAA ATCCCAAAAT ATTCCCAAAG TCCACCCCTT  
8281 TCCAAATGT CATGCCTACA ACTCATATAC CAAGCACTAA CCTACCAAAC ACCACTAAAA  
8341 CCCACAAAA TATATCTTAC CGAATATACA GTAACAAGCT ACCACCACAC TCGTTGGGTG  
8401 CAGTCGCCAG CTTAAAGATA TCTATCCACA TCAGCCACAA CTCCCTTCT TTAATAAACC  
8461 GACTACACC TTGGCTATTG AGGTATAG TGAATATACT GTAGACAAGA CACTTTCAAG  
8521 AAGACTGTTT CCAAAACGTA CCACTGTCCT CCACTACAAA CACACCAAT CTGCTTCTTC  
8581 TAGTCAAGGT TGCTACACCG GTAAATTATA AATCATCATT TCATTAGCAG GGCAGGGCCC  
8641 TTTTATAGA GTCTTATACA CTAGCGGACC CTGCCGGTAG ACCAACCCGC AGGCGGTCA  
8701 GTTTGTCTCT TCCATCAATG CGTCGTAGAA ACGACTTACT CTTCTTGAG CAGCTCCTTG  
8761 ACCTTGTGG CAACAAGTCT CCGACCTCGG AGGTGGAGGA AGAGCCTCCG ATATCGGCGG  
8821 TAGTGATACC AGCCTCGACG GACTCCTTGA CGGCAGCCTC AACAGCGTCA CCGGCGGGCT  
8881 TCATGTTAAG AGAGAATTG AGCATCATGG CGGCAGACAG AATGGTGGCA ATGGGGTTGA  
8941 CCTTCTGCTT GCCGAGATCG GGGCAGATC CGTGACAGGG CTCGTACAGA CCGAACGCCT  
9001 CGTTGGTGTG GGCAGAGAA GCCAGAGAGG CGGAGGGCAG CAGACCCAGA GAACCGGGGA  
9061 TGACGGAGGC CTCGTCGGAG ATGATATCGC CAAACATGTT GGTGGTGTAG ATGATACCAT  
9121 TCATCTTGGG GGGCTGCTTG ATGAGGATCA TGGCGGCCGA GTCGATCAGC TGGTGGTTGA  
9181 GCTCGAGCTG GGGGAATTG TCCTGAGGA CTCGAGTGAC AGTCTTTCGC CAAAGTCGAG  
9241 AGGAGGCCAG CACGTTGGCC TTGTCAAGAG ACCACACGGG AAGAGGGGGG TTGTGCTGAA  
9301 GGGCCAGGAA GCGGCCATT CGGCAATTC GCTCAACCTC AGGAACGGAG TAGGTCTCGG  
9361 TGTCGGAAGC GACGCCAGAT CCGTCATCCT CCTTTCGCTC TCCAAAGTAG ATACCTCCGA  
9421 CGAGCTCTCG GACAATGATG AAGTCGGTGC CCTCAACGTT TCGGATGGG GAGAGATCGG  
9481 CGAGCTTGGG CGACAGCAGC TGGCAGGGTC GCAGGTGGC GTACAGGTTT AGGTCTTTC  
9541 GCAGCTTGGG GAGACCCTGC TCGGGTCGCA CGTCGGTTCG TCCGTCGGGA GTGGTCCATA  
9601 CGGTGTTGGC AGCGCCTCCG ACAGACCGA GCATAATAGA GTCAGCCTTT CGGCAGATGT  
9661 CGAGAGTAGC GTCGGTGTAG GGCTCGCCCT CCTTCTCAAT GGCAGCTCCT CCAATGAGTC  
9721 GGTCTCGAA CACAACTCG GTGCCGAGG CCTCAGCAAC AGACTTGAGC ACCTTGACGG  
9781 CCTCGCAAT CACCTCGGG CCACAGAAGT CGCCCGGAG AAGAACAATC TTCTGGAGT  
9841 CAGTCTGGT CTCTTAGTT TCGGGTTCCA TTGTGGATGT GTGTGGTTGT ATGTGTGATG  
9901 TGGTGTGTGG AGTGAAAATC TGTGGCTGGC AAACGCTCTT GTATATATAC GCACTTTTGC  
9961 CCGTGCTATG TGAAGACTA AACCTCCGAA GATTGTGACT CAGGTAGTGC GGTATCGGCT  
10021 AGGGACCAA ACCTTGTCGA TGCCGATAGC GCTATCGAAC GTACCCAGCC GGCCGGGAGT  
10081 ATGTCGGAGG GGACATACGA GATCGTCAAG GGTGTGGC CAACTGGTAA ATAAATGATG  
10141 ACTCAGGCGA CGACGGAATT CTCATGTTG ACAGCTTATC AT

**Plasmid pUrLA sequences:**

1 CGATGCTTTT CGTAGATAAT GGAATACAAA TGGATATCCA GAGTATACAC ATGGATAGTA  
61 TACTGACA CGACAATTCT GTATCTCTT ATGTTAACTA CTGTGAGGCG TAAATAGAG  
121 CTTGATATAT AAAATGTTAC ATTTACAGT CTGAACTTTT GCAGATTACC TAATTTGGTA  
181 AGATATTAAT TATGAACTGA AAGTTGATGG CATCCCTAAA TTTGATGAAA GCCTAGGGCT

241 ATTCTTACGG TGTACAGTTA CGAGCACTTG TACTATAGTT TAGTTGTGGT TAAAACAACG  
301 TTGTGGCACA ATTGTAGTCC TCGCAGATCC CTACAAAGGC CGGCCATTGC ACGCAAATTG  
361 CACGAATTTT TCGCAGGCTT GCGCGACAAA TGCACCCAAA TACCGCACAA ATGACTCTGT  
421 TTTTCACTTT CTCGTTTTCT CCATATTCTC CATATTCTCC ATTTTTTTGC CGTCCGCAAA  
481 AACCCAATTC AACCCGGGGT ACAGGTTTGG TGCATGCTGT GCTAGATGAA AGTAGCCCTA  
541 TTCCACTTCG GAAGGATGGG ATCCGAGATT CAAAGTTACC CTGTCTCATG ATTATCCGAA  
601 CTTCCGGGTG TCCATGTGGT GCCAGGGACA GCGGCGCTAT GAGTAGAGAG ATGGAACGAG  
661 AATTACAGGA AGGGGGGGAG ACACAGATCA TGGCTGATAC AGATGTACCT GCGTCTTTTA  
721 CGTCTCCTGG GTCCTTCTCC ATGTGTATTT CGCACCCGCC AGGGCAATTA TATCCGCCTC  
781 TCCATGTGTC CATTTTTGTG TATCAGCTGT TGGGCGCTTG TCAAGCACAC CAATGACAAA  
841 CTTATAATG ACTCTGGGGA AGGAAGCGCA GTTTGGTGA AGTGTATGTA TGTAGTCTAA  
901 GGGAGTCATG TTCCAGCATG AGCAGGAGAG GTGGGCGGAA GGGAGAAAAA ACAATCCGAT  
961 ACCACTCCAA TGGTCATGTC ACCCCTCTCC TTCTATCTAC ACTCTGCCCT TCTCAACATA  
1021 CGACCCTATG GACACGCCTC TACTAACCCC AACTCAGGGA CTGCGGCTCA ACATTCTGCA  
1081 AGGCTTGGA GAATTTGACT TTTGGCTTCC GTCAACTTTT TTATTTTGA AGAAGTCAAA  
1141 AAGCTAATAG CACACGCATC GCAAACAATA TCGAGAGACG CCTATATAAA GGCAGCGTGT  
1201 CCTGATCCCT CCCTTCCGTA CTACCCATC TCACACAATA ACTTCGTATA GCATACATTA  
1261 TACGAAGTTA TGACGACAGA GACCGGGTTG GCGGCGCATT TGTGTCCCAA AAAACAGCCC  
1321 CAATTGCCCC AATTGACCCC AAATTGACCC AGTAGCGGGC CCAACCCCGG CGAGAGCCCC  
1381 CTTCTCCCA CATATCAAAC CTCCCCGGT TCCCACACTT GCCGTTAAGG GCGTAGGGTA  
1441 CTGCAGTCTG GAATCTACGC TTGTTCAGAC TTTGTA CTG TTTCTTTGTC TGGCCATCCG  
1501 GGTAACCCAT GCCGGACGCA AAATAGACTA CTGAAAATTT TTTTGCTTTG TGGTTGGGAC  
1561 TTTAGCCAAG GGTATAAAAG ACCACCGTCC CCGAATTACC TTTCTCTCTC TTTTCTCTCT  
1621 CTCCTTGTC ACTCACACCC GAAATCGTTA AGCATTTCCT TCTGAGTATA AGAATCATTC  
1681 AAATCTAGAA TGGTGAGTTT CAGAGGCAGC AGCAATTGCC ACGGGCTTTG AGCACACGGC  
1741 CGGGTGTGGT CCCATTCCCA TCGACACAAG ACGCCACGTC ATCCGACCAG CACTTTTTGC  
1801 AGTACTAACC GCAGCCCTCC TACGAAGCTC GAGCTAACGT CCACAAGTCC GCCTTTGCCG  
1861 CTCGAGTGCT CAAGCTCGTG GCAGCCAAGA AAACCAACCT GTGTGCTTCT CTGGATGTTA  
1921 CCACCACCAA GGAGCTCATT GAGCTTGCCG ATAAGGTCGG ACCTTATGTG TGCATGATCA  
1981 AGACCCATAT CGACATCATT GACGACTTCA CCTACGCCGG CACTGTGCTC CCCCTCAAGG  
2041 AACTTGCTCT TAAGCACGGT TTCTTCTGT TCGAGGACAG AAAGTTCGCA GATATTGGCA  
2101 ACACTGTCAA GCACCAGTAC AAGAACGGTG TCTACCGAAT CGCCGAGTGG TCCGATATCA  
2161 CCAACGCCCA CGGTGTACCC GGAACCGGAA TCATTGCTGG CCTGCGAGCT GGTGCCGAGG  
2221 AAAGTGTCTC TGAACAGAAG AAGGAGGACG TCTCTGACTA CGAGA ACTCC CAGTACAAGG  
2281 AGTTCCTGGT CCCCTCTCCC AACGAGAAGC TGGCCAGAGG TCTGCTCATG CTGGCCGAGC  
2341 TGTCTTGCAA GGGCTCTCTG GCCACTGGCG AGTACTCAA GCAGACCATT GAGCTTGCCC  
2401 GATCCGACC CGAGTTTGTG GTTGCTTCA TTGCCAGAA CCGACCTAAG GCGACTCTG  
2461 AGGACTGGCT TATTCTGACC CCCGGGGTGG GTCTTGACGA CAAGGGAGAC GCTCTCGGAC  
2521 AGCAGTACCG AACTGTTGAG GATGTCATGT CTACCGAAC GGATATCATA ATTGTCCGCC  
2581 GAGGTCTGTA CGGCCAGAAC CGAGATCCTA TTGAGGAGGC CAAGCGATAC CAGAAGGCTG  
2641 GCTGGGAGGC TTACCAGAAG ATTAAGTGT AGGGTACCGA CTAGTTCCAT GGCTGTCCC  
2701 CACGTTGCCG GTCTTGCCCT CTA CTACTACTG TCCATCAATG ACGAGGTCT CACCCCTGCC  
2761 CAGGTCGAGG CTCTTATTAC TGAGTCCAAC ACCGGTGTTC TTCCCACCAC CAACCTCAAG  
2821 GGCTCTCCA ACGCTGTGTC CTACAACGGT GTTGCCATTT AGGCAATTAA CAGATAGTTT

2881 GCCGGTGATA ATTCTCTTAA CCTCCACAC TCCTTTGACA TAACGATTTA TGTAACGAAA  
2941 CTGAAATTTG ACCAGATATT GTTGTAATA GAAAATCTGG CTTGTAGGTG GCAAAATGCG  
3001 GCGTCTTTGT TCATCAATTC CCTCTGTGAC TACTCGTCAT CCCTTTATGT TCGACTGTGC  
3061 TATTTCTTAT TTTCCATACA TATGCAAGTG AGATGCCCGT GTCCGTATC AAATCTAGTT  
3121 AATAACTTCG TATAGCATAC ATTATACGAA GTTATGCTAG CGTCCGGAGC GGCCGCGCAT  
3181 GCAAGTCGAC AACACTATAT AAGAATGTAT TTATTTTCTC TCTTAACCTA TTGATGTTC  
3241 TGATCTTGAG CTACTTGGAC TGGTACAGTA GCTATAGATG AGCCTTATGC ATGTCTCACA  
3301 CTAACTACAT AATATCTAAA AAAGCCGCTA ACGGCGTCTA CCCTTGTATA GTGCGGCTAC  
3361 AACCAAAGAT ACCACTTTGT GTCCAATCTC CATTGTGGG TGTC AATGGC GTGACGTGAA  
3421 GACGCGTGCG GACAGGCTTT GTAGATAAGG GTTGTAGATA AGACGTTATT GGAATGACAT  
3481 ATGTATTGTA CAGTGTAATT GTGCTGTAAG TACTCGTAAT TGCATCTGAC TGAGCTGTCT  
3541 TAATGATGTA TCGGGTTGAC ATATCTGAAC GTCGAAATTT GACACCTAGT TGCTTCTGAA  
3601 CACTCATCCT AATCACTGTT GATAATAGCT CAACACTCAT TGGAGCGCCG GAAATTAGTC  
3661 TTAGTCAGTT GTATTGTTTCG TGCATAGCT ACTGTATGTA CTGTAATACG GCTAATAGTG  
3721 TAATTTCCCG GCCAGGGGTT TTGGTTGAGT CTAGTTCAT CATGTGTTGG GAGAGCCAGA  
3781 ATACGATATT GTACAGGCAA ATAATACTCG TCTTATTTAG TCCTCGTACA GCACAAAGAA  
3841 AGTTGTTATC AGTGCCGATG TGCAGTATGT CGGCCGAGTC GGGACACAAG CAGAGAGTAC  
3901 GGGAGATGCA GTGGTCCGAC TCGGTTGTTT TCTGCTGTCG TACTTGTACC AGTGCAGTAT  
3961 ACACCAACAA GGATTTCTCG TCATACGGTC ATTGCAGCTG TGCTTCATGC GCTGTCAGGT  
4021 AATATCATAT CATGTCACCC CCATTTTGTG AGATCTCACT ATAAAGCATG TTCGTTATAC  
4081 TGTTATTCAA TGTC AACC AA GCTCTGAGCA GCTACTGCTG TAGTTATTAG TTGTAGTGTA  
4141 CAACAGCTAA GTATGAACCG GAAAGCATGT ATGAGTCAAC CTA CTGCGT CCCTAGGTAT  
4201 GTCTGATAAA AGGATGTAAC ATAGGCAAGC TGCTCGTGAG TGTTGAGTAC GAACCTTAGA  
4261 TCCAAATCAC CCGCACCCAC GGATATACTT GCTTGAATAT ACAGTAGTAT GCTCGACCGA  
4321 TGCCCTTGAG AGCCTTCAAC CCAGTCAGCT CCTTCCGGTG GGC GCGGGC ATGACTATCG  
4381 TCGCCGCACT TATGACTGTC TTCTTTATCA TGCAACTCGT AGGACAGGTG CCGGCAGCGC  
4441 TCTGGGTCAT TTTCCGGCAG GACCCTTTC GCTGGAGCGC GACGATGATC GGCTGTGCGC  
4501 TTGCGGTATT CGGAATCTTG CACGCCCTCG CTCAAGCCTT CGTCACTGGT CCCGCCACCA  
4561 AACGTTTCGG CGAGAAGCAG GCCATTATCG CCGGCATGGC GGCCGACGCG CTGGGCTACG  
4621 TCTTGCTGGC GTTCGCGACG CGAGGCTGGA TGGCCTTCCC CATTATGATT CTCTCGCTT  
4681 CCGGCGGCAT CCGGATGCCC GCGTTGCAGG CCATGCTGTC CAGGCAGGTA GATGACGACC  
4741 ATCAGGGACA GCTTCAAGGA TCGCTCGCGG CTCTTACCAG CCTAACTTCG ATCACTGGAC  
4801 CGCTGATCGT CACGGCGATT TATGCCGCT CGGCGAGCAC ATGGAACGGG TTGGCATGGA  
4861 TTGTAGGCGC CGCCCTATAC CTTGTCTGCC TCCCCGCGTT GCGTCGCGGT GCATGGAGCC  
4921 GGGCCACCTC GACCTGAATG GAAGCCGGCG GCACCTCGCT AACGGATTCA CCACTCCAAG  
4981 AATTGGAGCC AATCAATTCT TCGGAGAAAC TGTGAATGCG CAAACCAACC CTTGGCAGAA  
5041 CATATCCATC GCGTCCGCCA TCTCCAGCAG CCGCACGCGG CGCATCTCGG GCAGCGTTGG  
5101 GTCTTGCCA CGGGTGCGCA TGATCGTGCT CCTGTGTTG AGGACCCGGC TAGGCTGGCG  
5161 GGGTTGCCTT ACTGGTTAGC AGAATGAATC ACCGATACGC GAGCGAACGT GAAGCGACTG  
5221 CTGCTGAAA ACGTCTGCGA CCTGAGCAAC AACATGAATG GTCTTCGGTT TCCGTGTTTC  
5281 GTAAAGTCTG GAAACGCGGA AGTCAGCGCC CTGCACCATT ATGTTTCGGA TCTGCATCGC  
5341 AGGATGCTGC TGGCTACCCT GTGGAACACC TACATCTGTA TTAACGAAGC GCTGGCATTG  
5401 ACCCTGAGTG ATTTTTCTCT GGTCCC GCG CATCCATACC GCCAGTTGTT TACCCTCACA  
5461 ACGTTCCAGT AACCGGGCAT GTTCATCATC AGTAACCCGT ATCGTGAGCA TCCTCTCTCG

5521 TTTCATCGGT ATCATTACCC CCATGAACAG AAATCCCCT TACACGGAGG CATCAGTGAC  
5581 CAAACAGGAA AAAACCGCCC TTAACATGGC CCGCTTTATC AGAAGCCAGA CATTAACGCT  
5641 TCTGGAGAAA CTCAACGAGC TGGACGCGGA TGAACAGGCA GACATCTGTG AATCGCTCA  
5701 CGACCACGCT GATGAGCTTT ACCGCAGCAG ATCCGCGGCC CCATAGGCCA ATAGTGGATC  
5761 TGCTGCCTCG CGCGTTTCGG TGATGACGGT GAAAACCTCT GACACATGCA GCTCCCGGAG  
5821 ACGGTCACAG CTTGTCTGTA AGCGGATGCC GGGAGCAGAC AAGCCCGTCA GGGCGCGTCA  
5881 GCGGGTGTG GCGGGTGTG GGGCGCAGCC ATGACCCAGT CACGTAGCGA TAGCGGAGTG  
5941 TATACTGGCT TAACTATGCG GCATCAGAGC AGATTGTACT GAGAGTGCAC CATATGCGGT  
6001 GTGAAATACC GCACAGATGC GTAAGGAGAA AATACCGCAT CAGGCGCTCT TCCGCTTCTT  
6061 CGCTCACTGA CTCGCTGCGC TCGGTGCTTC GGCTGCGGCG AGCGGTATCA GCTCACTCAA  
6121 AGGCGGTAAT ACGGTTATCC ACAGAATCAG GGGATAACGC AGGAAAGAAC ATGTGAGCAA  
6181 AAGGCCAGCA AAAGGCCAGG AACCGTAAAA AGGCCGCGTT GCTGGCGTTT TTCCATAGGC  
6241 TCCGCCCCC TGACGAGCAT CAAAAAATC GACGCTCAAG TCAGAGGTGG CGAAACCCGA  
6301 CAGGACTATA AAGATACCAG GCGTTTCCCC CTGGAAGCTC CCTCGTGCGC TCTCTGTTC  
6361 CGACCCTGCC GCTTACCGGA TACCTGTCCG CCTTCTCC TTCGGAAGC GTGGCGCTTT  
6421 CTCATAGCTC ACGCTGTAGG TATCTCAGTT CGGTGTAGGT CGTTCGCTCC AAGCTGGGT  
6481 GTGTGCACGA ACCCCCCGT CAGCCGACC GCTGCGCCTT ATCCGTAAC TATCGTCTTG  
6541 AGTCCAACCC GGTAAGACAC GACTTATCG CACTGGCAGC AGCCACTGGT AACAGGATTA  
6601 GCAGAGCGAG GTATGTAGGC GGTGCTACAG AGTTCTGAA GTGGTGGCCT AACTACGGT  
6661 AACTAGAAG GACAGTATTT GGTATCTGCG CTCTGCTGAA GCCAGTTACC TTCGAAAAA  
6721 GAGTTGGTAG CTCTTGATCC GGCAACAAA CCACCGCTGG TAGCGGTGGT TTTTTGTTT  
6781 GCAAGCAGCA GATTACGCGC AGAAAAAAG GATCTCAAGA AGATCCTTG ATCTTTTCTA  
6841 CGGGGTCTGA CGCTCAGTGG AACGAAAAC CACGTTAAGG GATTTTGGTC ATGAGATTAT  
6901 CAAAAAGGAT CTTACCTAG ATCCTTTTAA ATAAAAATG AAGTTTTAAA TCAATCTAAA  
6961 GTATATATGA GTAAACTTGG TCTGACAGTT ACCAATGCTT AATCAGTGAG GCACCTATCT  
7021 CAGCGATCTG TCTATTTCTG TCATCCATAG TTGCCTGACT CCCCCTCGTG TAGATAACTA  
7081 CGATACGGGA GGGCTTACCA TCTGCCCCA GTGCTGCAAT GATACCGCGA GACCCACGCT  
7141 CACCGGCTCC AGATTTATCA GCAATAAACC AGCCAGCCGG AAGGGCCGAG CGCAGAAGTG  
7201 GTCCTGCAAC TTTATCCGCC TCCATCCAGT CTATTAATTG TTGCCGGAA GCTAGAGTAA  
7261 GTAGTTCGCC AGTTAATAGT TTGCGCAACG TTGTTGCCAT TGCTGCAGGC ATCGTGGTGT  
7321 CACGCTCGTC GTTTGGTATG GCTTCATTCA GCTCCGGTTC CCAACGATCA AGGCGAGTTA  
7381 CATGATCCCC CATGTTGTGC AAAAAAGCGG TTAGCTCCTT CGGTCCTCCG ATCGTTGTCA  
7441 GAAGTAAGTT GGCCGAGTG TTATCACTCA TGGTTATGGC AGCACTGCAT AATTCTCTTA  
7501 CTGTCATGCC ATCCGTAAGA TGCTTTTCTG TGAAGTGTGA GACTCAACC AAGTCATTCT  
7561 GAGAATAGTG TATGCGCGCA CCGAGTTGCT CTTGCCCGGC GTCAACACGG GATAATACCG  
7621 CGCCACATAG CAGAACTTTA AAAGTGCTCA TCATTGAAA ACGTTCTTCG GGGCGAAAAC  
7681 TCTCAAGGAT CTTACCGCTG TTGAGATCCA GTTCGATGTA ACCCACTCGT GCACCCAAT  
7741 GATCTTCAGC ATCTTTTACT TTCACCAGCG TTTCTGGGTG AGCAAAAAACA GGAAGGCAAA  
7801 ATGCCGAAA AAAGGGAATA AGGGCGACAC GGAAATGTTG AATACTCATA CTCTTCCTTT  
7861 TTCAATATTA TTGAAGCATT TATCAGGGTT ATTGTCTCAT GAGCGGATAC ATATTTGAAT  
7921 GTATTTAGAA AAATAACAA ATAGGGTTC CGCGCACATT TCCCCGAAA GTGCCACCTG  
7981 ACGTCTAAGA AACCATTATT ATCATGACAT TAACCTATAA AAATAGGCGT ATCACGAGGC  
8041 CCTTTCGTCT TCAAGAATTC ATGTACACA AACCGATCTT CGCCTCAAGG AAACCTAATT  
8101 CTACATCCGA GAGACTGCCG AGATCTGTTC GGAATCAAC GGATGCTCAA CCGATTTCTGA

8161 CAGTAATAAT TTGAATCGAA TCGGAGCCTA AAATGAACCC GAGTATATCT CATAAAATTC  
8221 TCGGTGAGAG GTCTGTGACT GTCAGTACAA GGTGCCTTCA TTATGCCCTC AACCTTACCA  
8281 TACCTCACTG AATGTAGTGT ACCTCTAAAA ATGAAATACA GTGCCAAAAG CCATGGCACT  
8341 GAGCTCGTCT AACGGACTTG ATATACAACC AATTAACAACA AATGAAAAGA AATACAGTTC  
8401 TTTGTATCAT TTGTAACAAT TACCCTGTAC AAATAAGGT ATTGAAATCC CACAATATTC  
8461 CCAAAGTCCA CCCCTTTCCA AATTGTCATG CCTACAACCT ATATACCAAG CACTAACCTA  
8521 CCAAACACCA CTAACACCCC ACAAATATA TCTTACCGAA TATACAGTAA CAAGCTACCA  
8581 CCACACTCGT TGGGTGCAGT CGCCAGCTTA AAGATATCTA TCCACATCAG CCACAACCTC  
8641 CTTCTTTAA TAAACCGACT ACACCCTTGG CTATTGAGGT TATGAGTGAA TATACTGTAG  
8701 ACAAGACACT TTCAAGAAGA CTGTTTCCAA AACGTACCAC TGTCCTCCAC TACAAACACA  
8761 CCAATCTGC TTCTTCTAGT CAAGGTTGCT ACACCGGTAA ATTATAAATC ATCATTTCAT  
8821 TAGCAGGGCA GGGCCCTTTT TATAGAGTCT TATACTAG CGGACCCTGC CGGTAGACCA  
8881 ACCCGCAGGC GCGTCAGTTT GTCCTTCCA TCAATGCGTC GTAGAAACGA CTTACTCCTT  
8941 CTTGAGCAGC TCCTTGACCT TGTTGGCAAC AAGTCTCCGA CCTCGGAGGT GGAGGAAGAG  
9001 CCTCCGATAT CGGCGGTAGT GATACCAGCC TCGACGGACT CCTTGACGGC AGCCTCAACA  
9061 GCGTCACCGG CGGGCTTCAT GTTAAGAGAG AACTTGAGCA TCATGGCGGC AGACAGAATG  
9121 GTGGCAATGG GGTGACCTT CTGCTTCCG AGATCGGGG CAGATCCGTG ACAGGGCTCG  
9181 TACAGACCGA ACGCCTCGTT GGTGTCGGC AGAGAAGCCA GAGAGGCGGA GGGCAGCAGA  
9241 CCCAGAGAAC CGGGATGAC GGAGCCTCG TCGGAGATGA TATCGCCAAA CATGTTGGTG  
9301 GTGATGATGA TACCATTTCAT CTTGGAGGGC TGCTTGATGA GGATCATGGC GGCCGAGTCG  
9361 ATCAGCTGGT GGTGAGCTC GAGCTGGGG AATTCGTCCT TGAGGACTCG AGTGACAGTC  
9421 TTTCGCCAAA GTCGAGAGGA GGCCAGCACG TTGGCCTTGT CAAGAGACCA CACGGGAAGA  
9481 GGGGGTGTG GCTGAAGGGC CAGGAAGGCG GCCATTCGGG CAATTCGCTC AACCTCAGGA  
9541 ACGGAGTAGG TCTCGGTGTC GGAAGCGACG CCAGATCCGT CATCTCCTT TCGCTCTCCA  
9601 AAGTAGATAC CTCCGACGAG CTCTCGGACA ATGATGAAGT CGGTGCCCTC AACGTTTCGG  
9661 ATGGGGGAGA GATCGGCGAG CTTGGGCGAC AGCAGCTGGC AGGGTCGAG GTTGGCGTAC  
9721 AGGTTTCAGT CCTTTCGAG CTTGAGGAGA CCCTGCTCG GTCGCACGTC GGTTCTGCCG  
9781 TCGGGAGTGG TCCATACGGT GTTGGCAGC CCTCCGACG CACCGAGCAT AATAGAGTCA  
9841 GCCTTTCGGC AGATGTCGAG AGTAGCGTCG GTGATGGGCT CGCCCTCCTT CTCAATGGCA  
9901 GCTCCTCCAA TGAGTCGGTC CTCGAACACA AACTCGGTGC CGGAGGCCTC AGCAACAGAC  
9961 TTGAGCACCT TGACGGCCTC GGCAATCACC TCGGGGCCAC AGAAGTCGCC GCCGAGAAGA  
10021 ACAATCTTCT TGGAGTCAGT CTTGGTCTTC TTAGTTTCGG GTTCCATTGT GGATGTGTGT  
10081 GGTGTATGT GTGATGTGGT GTGTGGAGTG AAAATCTGTG GCTGGCAAAC GCTCTTGTAT  
10141 ATATACGCAC TTTTGCCCGT GCTATGTGGA AACTAAACC TCCGAAGATT GTGACTCAGG  
10201 TAGTGCGGTA TCGGCTAGGG ACCCAAACCT TGTCGATGCC GATAGCGCTA TCGAACGTAC  
10261 CCAGCCGGCC GGGAGTATGT CGGAGGGGAC ATACGAGATC GTCAAGGGTT TGTGGCCAAC  
10321 TGGTAAATAA ATGATGACTC AGGCGACGAC GGAATCTCA TGTTTGACAG CTATCAT

**rgTAL sequences:**

1 ATGGCCCTT CGCTGGACAG CATCTCCCAT TCGTTCGCAA ACGGCGTTGC ATCTGCTAAG  
61 CAGGCAGTGA ACGGCGCATC GACAAACCTG GCTGTGGCTG GCAGCCACCT GCCCACCACA  
121 CAAGTCACTC AGGTTGACAT TGTGAAAAA ATGCTTGCCG CACCCACGGA TAGCACTCTG  
181 GAGCTGGACG GATACTCCCT TAATCTGGGC GATGTGGTCA GCGCTGCACG GAAGGGCCGG  
241 CCCGTTCTGT TGAAGGATTC TGACGAAATT AGATCTAAGA TCGACAAATC CGTGGAATTT

301 CTTAGATCTC AACTTTTCGAT GTCTGTGTAC GCGTCACTA CAGGCTTCGG CGGTTCCGGCT  
361 GATACTCGGA CTGAAGACGC TATCTCGCTT CAAAAGGCTC TCCTTGAACA TCAGCTCTGT  
421 GCGTCCCTC CTAGCTCCTT TGACAGCTTT AGACTCGGAA GAGGCCTCGA AAACTCGCTC  
481 CCCCTCGAAG TTGTTCCGGG AGCAATGACA ATTCGTGTCA ACTCGCTTAC ACGAGGTCAT  
541 TCTGCAGTCC GGCTGGTTGT GCTGGAGGCT CTTACTAATT TTCTGAATCA CGGAATTACC  
601 CCCATCGTTC CCCTTCGGGG TACAATTTCT GCAAGCGGTG ACCTGTCTCC CCTGTCTGAT  
661 ATCGCAGCTG CCATTTCCGG CCACCTGAT TCTAAAGTGC ACGTCTGCA CGAAGGAAAA  
721 GAAAAAATCC TGTATGCACG TGAAGCAATG GCTCTCTTCA ATCTTGAACC TGTGTGCTC  
781 GGTCCCAAAG AAGGCCTGGG TCTCGTTAAT GGCACCGCTG TCTCTGCCTC TATGGCTACG  
841 CTTGCTCTGC ATGACGCACA CATGCTGTCT CTTCTGTCTC AGTCCCTGAC CGCTATGACT  
901 GTGGAGGCTA TGGTTGGTCA CGCCGGTTCG TTCCACCCTT TTCTTCATGA CGTCACTCGA  
961 CCCCATCCCA CTCAAATTGA AGTCGCAGGC AACATTAGAA AGCTCCTGGA GGGATCCCGA  
1021 TTTGCCGTCC ATCACGAAGA AGAAGTGAAG GTCAAGGACG ATGAGGGAAT CCTGCGGCAA  
1081 GATCGTTACC CCCTCAGAAC GTCTCCCAG TGGCTGGGAC CCCTGGTTTC TGACCTGATC  
1141 CATGCCACG CTGTTCTGAC GATCGAAGCA GGACAATCTA CTA CTGATAA TCCCCTGATT  
1201 GATGTGGAAA ACAAACCTC CCATCATGGT GGCAACTTTC AAGCAGCTGC TGTGGCTAAC  
1261 ACAATGAAA AGACACGTCT TGGTCTTGCC CAGATCGGCA AGCTCAACTT CACTCAACTT  
1321 ACCGAGATGC TCAACGCAGG AATGAACCGT GGTCTGCCTA GCTGCCTGGC AGCCGAGGAT  
1381 CCCTCTCTTT CTTACCATTG TAAAGGCCTC GACATCGCAG CTGCCGCTTA CACTTCCGAG  
1441 CTGGGCCACC TTGCAAATCC TGTGACCACT CATGTGCAGC CCGCTGAAAT GGCCAACCAA  
1501 GCAGTCAACT CCCTTGCTCT CATCTCGGCA CGACGGACCA CTGAATCCAA CGATGTGCTC  
1561 TCCCTCCTCC TTGCAACACA TCTCTACTGT GTCCTCAGG CTATCGATCT CCGAGCAATC  
1621 GAGTTTGAAT TCAAGAAACA GTTTGGTCCC GCCATTGTGT CGCTGATCGA TCAACACTTC  
1681 GGTTCGCCA TGACAGGCTC TAATCTGCGT GACGAGCTTG TCGAGAAAGT TAACAAGACG  
1741 CTCGCCAAGC GGCTGGAACA GACAAACAGC TACGATCTTG TTCCTCGATG GCATGATGCC  
1801 TTTTCGTTG TTGCAAGCAC AGTGGTGGAA GTGCTGTCTT CTACGTCTCT TTCTCTTGCC  
1861 GCCGTTAAGC CCTGGAAGT GGCCGTGCC GAGAGCGCAA TCTCTCTTAC CCGGCAAGTC  
1921 CGTGAACCT TTTGGAGCGC AGCCAGCACT TCCAGCCCTG CTCTGTCGTA CCTTTCGCC  
1981 CGGACTCAGA TCCTGTATGC TTTTGTCCGT GAGGAGCTTG GTGTCAAGGC TCGTCGTGGA  
2041 GATGTCTTCC TTGAAAGCA AGAGGTCACA ATTGGTAGCA ACGTGTGCGA AATTTACGAA  
2101 GCTATTAAGT CCGGCCGTAT CAACAACGTT CTGCTGAAAA TGCTTGCTTA A

**VvSTS1 sequences:**

1 ATGGCTTCGG TGGAAGAATT CCGTAATGCT CAGCGAGCCA AAGGCCCGC CACCATCCTC  
61 GCAATTGGCA CCGCCACTCC TGACCATTGC GTCTATCAAT CCGACTACGC CGACTACTAT  
121 TTTCCGGTTA CGAAGTCCGA GCACATGACA GAACTGAAAA AAAAATTTAA CCGAATCTGC  
181 GACAAGAGCA TGATCAAGAA GCGATACATT CATCTTACGG AGGAAATGCT TGAGGAACAT  
241 CCCAACATCG GTGCATATAT GGCCCTTCG CTTAACATTC GTCAAGAGAT TATTA CTGCA  
301 GAAGTTCCCA GACTTGGACG AGACGCAGCC CTTAAGGCC TCAAAGAATG GGGTCAACCC  
361 AAGTCCAAGA TTACGCATCT TGTTTTTTGC ACAACCAGCG GCGTCGAGAT GCCTGGTGCC  
421 GATTATAAGC TCGCAAATCT TCTCGCCTG GAGACTAGCG TCCGGCGTGT GATGCTCTAC  
481 CATCAGGGTT GCTATGCAGG CGGAACTGTG CTCCGAACGG CAAAAGACCT CGCAGAAAAAC  
541 AATGCCGGAG CTCGAGTCTT CGTTGTTTGC AGCGAGATCA CAGTCTGAC CTTCCTGGC  
601 CCCAGCGAGG ACGCTCTCGA CTCCCTCGTC GGCCAAGCTC TCTTCGGTGA TGCTCTTCT

661 GCCGTGATCG TCGGATCTGA TCCCGATGTC TCCATTGAGC GTCCTCTTTT CCAGCTTGTG  
 721 AGCGCTGCCC AGACGTTTCAT TCCTAACTCT GCAGGCGCTA TTGCAGGAAA TCTTCGGGAG  
 781 GTTGGCCTCA CCTTCCATCT CTGGCCTAAT GTGCCACACC TTATCAGCGA GAATATCGAA  
 841 AAATGTCTGA CCCAGGCATT TGACCCTCTC GGCATCTCGG ATTGGAATAG CCTGTTCTGG  
 901 ATTGCACATC CTGGCGGTCC TGCAATCCTT GATGCAGTGG AGGCTAAGCT GAACCTTGAG  
 961 AAAAAGAAAC TGGAAAGCCAC AAGACATGTT CTTTCCGAGT ATGGAAACAT GTCTTCCGCA  
 1021 TGTGTCCTGT TCATTCTGGA TGAGATGCGT AAGAAATCCC TGAAAGGTGA GAAAGCCACC  
 1081 ACCGGTGAGG GTCTGGACTG GGGAGTGCTC TTCGGATTCC GCCCCGGTCT TACAATCGAG  
 1141 ACCGTCGTCC TGCACTCCGT TCCCACCGTG ACGAACTAA

**Pc4CL2 sequences:**

1 ATGGGCGATT GTGTTGCACC CAAGGAAGAT CTTATCTTTC GGAGCAAGCT CCCTGATATC  
 61 TACATCCCCA AACACCTGCC TCTTCACACA TATTGCTTCG AGAACATCTC TAAAGTCGGT  
 121 GACAAGTCCT GTCTCATTAA CGGTGCTACG GGTGAGACCT TCACTTATTC GCAAGTGGAA  
 181 CTTCTCTCCC GTAAGGTGGC ATCGGGTCTC AACAAGCTTG GCATTCAGCA GGGAGACT  
 241 ATTATGCTGC TCCTGCCCAA CTCCCCTGAG TATTTTTTCG CTTTCTTGG CGCCTCCTAC  
 301 CGTGGTGCCA TTTGACGAT GGCAAACCCC TTCTTTACAT CCGCAGAAGT CATTAAACAG  
 361 CTCAAAGCAT CCCTTGCTAA GCTCATTATT ACGCAGGCTT GCTACGTGGA CAAGGTTAAG  
 421 GATTACGCTG CTGAAAAAAA TATCCAGATT ATTTGTATTG ACGACGCCCC TCAAGACTGC  
 481 CTTCACTTCT CGAAGCTGAT GGAGGCAGAT GAGAGCGAAA TGCCCCGAGT CGTGATCGAC  
 541 TCGGATGACG TTGTTGCCCT CCCCTATTCC AGCGGCACCA CGGGTCTTCC TAAAGGCGTG  
 601 ATGCTCACAC ATAAAGGACT TGTGACATCC GTCGCCAAC AAGTGGATGG AGATAATCCT  
 661 AATCTTTATA TGCAATCCGA AGACGTTATG ATCTGCATCC TCCCTCTGTT CCACATCTAC  
 721 TCTCTTAATG CTGTCCTTTG CTGCGGTCTC CGTGTGGCG TGACAATTCT TATCATGCAG  
 781 AAGTTTGATA TTGTTCCCTT CCTGGAGCTG ATTCAGAAGT ATAAAGTTAC GATCGGTCCC  
 841 TTTGTGCCTC CCATTGTTCT GGCAATTGCA AAGTCCCCTG TTGTTGATAA GTACGATCTG  
 901 TCGTCCGTTT GAACGGTGAT GTCTGGAGCA GCACCTCTTG GAAAAGAAGT GGAAGATGCA  
 961 GTTAGAGCTA AGTTTCCCAA TGCTAAACTG GGACAAGGTT ACGGTATGAC AGAGGCCGGT  
 1021 CCTGTTCTTG CAATGTGTCT CGCTTTCGCA AAGGAGCCCT ATGAAATCAA ATCTGGCGCT  
 1081 TGTGGTACTG TTGTCCGAAA CGCTGAGATG AAGATTGTGG ACCCTGAAAC TAACGCCTCT  
 1141 CTTCCCAGAA ACCAAAGAGG TGAAATTTGC ATTCGAGGCG ATCAAATTAT GAAGGGATAC  
 1201 CTGAACGACC CTGAATCTAC GCGAACGACA ATTGACGAGG AAGGTTGGCT TCACACCGGA  
 1261 GATATTGGAT TCATTGATGA TGATGACGAG CTCTTCATTG TCGACCGTCT TAAAGAGATC  
 1321 ATCAAGTATA AGGGTTTCCA GGTCGCCCTT GCTGAGCTGG AGGCTCTCCT GCTGACTCAT  
 1381 CCCACCATTG CTGACGCTGC AGTTGTTCCCT ATGATCGACG AAAAGGCTGG AGAAGTGCCC  
 1441 GTTGCATTTG TGGTTAGAAC CAACGGATTT ACAACGACCG AGGAAGAGAT CAAGCAATTC  
 1501 GTGTCTAAGC AAGTCGTCTT TTACAAACGT ATTTTTCGGG TCTTCTTGT GGACGCTATT  
 1561 CCAAGTCCC CCTCCGGTAA GATTCTTCGA AAGGATCTTA GAGCTAAGAT CGCCTCTGGA  
 1621 GACCTTCCTA AATAA

**Bbxfpk sequences:**

1 ATGACATCTC CCGTCATCGG CACGCCTTGG AAGAACTCA ATGCTCCTGT GTCCGAGGAA  
 61 TCTCTTGAGG GAGTGGATAA AACTGGAGA GTGGCTAACT ACCTCTCTAT TGGTCAGATC  
 121 TACCTTCGTT CGAATCCCCT CATGAAGGCA CCTTTTACAC GAGAGGATGT GAAACATCGG



181 CTCGTCGGAC ATTGGGGTAC TACACCCGGC CTTAATTTTC TTATCGGTCA TATTAACAGA  
241 TTCATTGCAG ACCATGGACA GAACACAGTT ATCATCATGG GTCCTGGCCA TGGTGGCCCC  
301 GCAGGAACGT CCCAGAGCTA TCTTGATGGA ACGTATACAG AGACCTTCC CAAAATTACG  
361 AAGGACGAAG CTGGCCTCCA GAAGTTTTTT CGGCAGTTCT CGTATCCCGG AGGAATCCCT  
421 AGCCACTTCG CACCTGAGAC GCCCGGTTCT ATCCACGAAG GTGGAGAACT TGGTTACGCT  
481 CTCTCGCATG CCTACGGTGC TATTATGGAT AATCCCTCGC TTTTGTCCC TGCCATTGTT  
541 GGAGATGGAG AAGCAGAAAC GGGACCTCTT GCTACTGGTT GGCAGTCTAA CAAGCTTGTG  
601 AATCCTCGGA CAGATGGAAT CGTGCTCCCT ATCCTTCATC TGAATGGTTA TAAGATCGCT  
661 AACCCACTA TTCTGTCTCG TATCTCGGAT GAAGAGCTCC ATGAGTTTTT CCACGGAATG  
721 GGCTACGAGC CTTATGAATT CGTGCTGGA TTTGACGACG AGGACCATAT GAGCATCCAC  
781 CGTCGATTCT CCGAACTCTG GGAGACCATT TGGGACGAGA TCTGCGACAT TAAGGCAGCT  
841 GCACAAACGG ATAATGTTC CCGACCTTTC TACCCCATGC TCATCTCCG AACGCCAAG  
901 GGCTGGACTT GTCCCAAGTA TATTGACGGA AAAAAGACCG AAGGTTCTTG GAGAGCTCAC  
961 CAGGTCCCC TTGCTTCCGC TCGTGATACG GAAGCACACT TTGAGGTGCT GAAGAACTGG  
1021 CTTGAATCCT ATAAGCCCGA GGAGCTTTTT GATGCAAACG GCGCCGTCAG GGATGACGTC  
1081 CTTGCATTTA TGCTAAAGG AGAGCTCCGA ATCGGCGCCA ACCCCAATGC CAACGGTGGC  
1141 GTTATCCGAG ATGATCTGAA ACTGCCTAAC CTGGAAGACT ATGAGGTCAA AGAGGTTGCT  
1201 GAATATGGTC ATGGATGGGG ACAGCTTGAG GCCACCCGAA CGCTCGGTGC ATATAACCGT  
1261 GACATCATTC GAAACAACCC TCGAGATTTT CGAATTTTCG GACCCGACGA AACAGCATCC  
1321 AACCGACTGC AGGCCCTCCTA TGAGGTGACG AACAAACAAT GGGATGCCGG ATACATTTCG  
1381 GACGAAGTTG ACGAGCACAT GCACGTGTCC GGACAGGTTG TCGAGCAGCT GTCGGAACAT  
1441 CAAATGGAAG GATTCTCGA GGCCTATCTG CTCACCGAA GACACGGAAT CTGGAGCTCC  
1501 TACGAGAGCT TGTCCACGT TATTGATTCG ATGCTGAATC AACATGCTAA ATGGCTCGAA  
1561 GCAACGGTCA GAGAGATTCC CTGGCGAAAG CCCATTGCAT CGATGAATCT TCTGGTGTCC  
1621 TCGCACGTCT GCGCAGAGGA TCACAACGGT TTCTCCCATC AAGACCCTGG AGTGACCTCG  
1681 GTCCTGTCTA ATAAGTGCTT CCATAACGAC CATGTTATCG GTATCTACTT TGCAACCGAC  
1741 GCAAATATGC TCCTCGCAAT CGCAGAGAAA TGTTACAAA GCACGAATAA AATTAATGCA  
1801 ATCATTGCCG GCAAGCAGCC TGCCGCAACG TGGCTGACTC TTGATGAGGC ACGAGCCGAA  
1861 CTTGCTAAAG GCGCAGCCGC ATGGGATTGG GCTTCCACGG CCAAGAACAA CGATGAGGCC  
1921 GAGGTCTGTC TCGCAGCTGC AGGCGACGTG CCTACGCAGG AGATCATGGC CGCCTCTGAT  
1981 AAGCTGAAAG AGCTCGGAGT CAAGTTTAAA GTTGTTAATG TTGCTGATCT CCTGTCCCTG  
2041 CAGAGCGCCA AGGAAAATGA TGAAGCCCTC AGCGACGAAG AATTCGCAGA TATCTTACC  
2101 GCTGATAAGC CTGTGCTTTT CGCTTATCAC AGCTACGCC ACGACGTGCG AGGTCTGATT  
2161 TACGACCGAC CCAATCATGA CAACTTTAAT GTCCATGGCT ATGAAGAAGA AGGTTCGACC  
2221 ACTACCCCTT ATGATATGGT CCGGGTCAAT CGGATCGATC GATATGAGCT CACGGCAGAA  
2281 GCTCTGAGAA TGATTGACGC AGACAAGTAT GCTGATAAAA TCGACGAGCT CGAGAAGTTT  
2341 CGGGATGAGG CCTTCCAGTT TGCAGTCGAT AAGGGCTATG ATCATCCGA TTATACCGAT  
2401 TGGGTTTACT CTGGCGTCAA CACGGATAAA AAAGGCGCCG TCACCGCAAC CGCCGCAACA  
2461 GCAGGCGACA ATGAGTAA

**AcxpkA sequences:**

1 ATGTCAAAAA CGGCGACAAA TGCGGAACCT AACTGAAAC CGCAAGAACT TCAGCGCATG  
61 GACGCGTATT GCGCGCTTG TAATTATTTA GCGCGGGCA TGATCTATCT GCGCGAGAA  
121 CCGCTTCTGA AAGAGCCGCT GCGCCCGAG CATATTAATA ACCGTTTACT GGGACATTGG

181 GGAAGCGACC CGGGCCAGTC TTTTGTGTGG GTGCATCTGA ACCGTTTAAT TAGAGAGCAA  
241 GATTTAAACA TGATCTACAT CAGCGGACCC GGTACACGGC CACCCGCTAC GCTTGCGAAC  
301 TGCTACCTTG AAGGCACGTA CTCAGAGATC TACCCCGATA AAAGCCATGA CGTGGAGGGT  
361 ATGCGTAAAGT TCTTCCGCCA ATTTAGCTTT CCGGGCGGCA TCGGATCACA TTGCACGCCG  
421 GAAACACCGG GCTCAATCCA TGAAGGCGGA GAACTGGGAT ACTCACTTAG CCACGCATTT  
481 GGC GCGCGT TTGATCATCC GGATCTGATC GTGAACGTGG TGGTTGGCGA CGGAGAAGCA  
541 GAAACTGGTC CGATGGCAAC AAGCTGGCAC GCAAATAAGT TTTTAAACCC CGCTCGCGAT  
601 GGAGCGGTGC TGCCGATTCT GCATCTTAAC GGCTATAAGA TCGCGAACCC GACGATCCTT  
661 GCGCGCATCT CACATGAAGA GCTGGAAGCG CTGTTTACTG GTTACGGATG GAAGCCGTAT  
721 TTCGTGGAAG GAAGCGAAC GGAACAGATG CATCAGAAAA TGGCGGCGAC ACTGGACAGC  
781 TGTGTGCGCG AAATTAAGGA GATCCAAGAA CAAGCGCGCG AAAGCGGCAA ATGGGAGCGC  
841 CCTCGCTGGC CTATGATTGT GCTGCGCTCA CCGAAAGGCT GGA CTGGTCC GAAAGAAGTG  
901 GATGGACACA AGTGAGGAGGA TTTCTGGAGA GCGCATCAAG TGCCGATTTT AGGCGTTAAG  
961 GAAAACCCGG AACATCTGAA AATGCTGGAG GCGTGGATGC GCTCATA CGA GCCGGAAAA  
1021 CTGTTTGATG AGAGCGGACG TTTAGTTGCA GAACTGCAAG AACTTGCACC GAAGGGCGAC  
1081 CGCAGAAATGA GCGCGAATCC TCATACGAAC GCGCGCAAAT TACGCAAGCC GCTGGATCTG  
1141 CCGGCGTTTT GTGACTTCGC ACTTAAATTT CAGAGACCGG GCGAGATGTA CGCATCATCA  
1201 ACAGAGACGC TGGGAACGTA TCTGGCAGAG GTGTTTAGAC GCAATCCGGA GAGCTTTCGT  
1261 TTATTCGGCC CGGATGAAAC GGCAAGCAAC AACTGAGCG GCGGTACGA AGCGACAAAG  
1321 AAAACGTGGG AAGCTGGTTA CAAGCCGGAG GATGCGGATG GCGGCGAACT TCGGCGGAT  
1381 GGCAGAGTTA TGGAGATGCT GAGCGAACAT ACGCTGGAAG GCTGGCTTGA GGGCTATCTG  
1441 CTGACTGGTC GCCATGGCTT CTTTGCACG TATGAAGCGT TCGTGCACGT GATTGATAGC  
1501 ATGTTCAATC AGCACGCGAA GTGGCTGGAA AAGTCAAAGA AGGAGATCCG CTGGCGCGCA  
1561 CCGATCAGCT CTTTAAATCT GCTGATCACA AGCGTGGTTT GGAGACAAGA TCACAACGGC  
1621 TTTACGCACC AAGATCCCGG TTTTCTGGAC ATCGTGGCAA ATAAGAGCGC AGAGGTGACG  
1681 CGCATTATC TGCCGCGGGA TGCGAATTGT TTAGTGTGAG TGGCGGACCA TTGTTTAAAG  
1741 AGCACAGATT ATGTGAACGT GATCGTTGCG GACAAACAGC CTCATCTTCA ATTTCTGAGC  
1801 GCGGACGAGG CAATCAAACA CTGCACAAAG GGCATCGGCA TCTGGGAGTG GGCATCAACA  
1861 GACAAGGGCT GTGAACCGGA CGTGGTGATC GCATCAGCTG GTGATATTGC GACAATGGAG  
1921 GCACTTGACAG CAGCGGCGCT GCTTCGCGAA CATTTTCCTA AATTA AAAAT CAGATTTGTG  
1981 AATGTTGTTG ATTTATTAG ACTGGTTCCG GAAGATGAAC ATCCTCACGG ACTGCCGGAG  
2041 AGAGACTATG ATTCTTTATT TCCTCCGAC ACGCCGGTGA TTTTAACTT CCATGGCTAT  
2101 CCTCAGCTGA TCCACCGCCT TACGTATCAA CGCAACAACC ACCACAACCT TCACGTGCAT  
2161 GGATATCGCG AGAGAGGCAA CATCAACACG CCTCTGAGC TGGCGATTAT GAACAAAGTG  
2221 GATCGCTTTC ATCTTGCGAT GAACGCGATT GATCGCGTTC CCGGTCTTAG AGCAATTGGC  
2281 GGACATCGCA AAAACTGGCT GTTCGACCAA GTTACAGAGC ACGTTATGTA CGCGCACGAG  
2341 CACGGCATTG ATCCGGAAGC GATCAATGAA TGGACGTGGC CGGAATAA

## References

- Lv, Y., H. Edwards, J. Zhou and P. Xu (2019). "Combining 26s rDNA and the Cre-loxP system for iterative gene integration and efficient marker curation in *Yarrowia lipolytica*." *ACS Synth Biol*.
- Lv, Y., M. Marsafari, M. Koffas, J. Zhou and P. Xu (2019). "Optimizing Oleaginous Yeast Cell Factories for Flavonoids and Hydroxylated Flavonoids Biosynthesis." *ACS Synth Biol* **8**(11): 2514-2523.
- Madzak, C., B. Treton and S. Blanchin-Roland (2000). "Strong hybrid promoters and integrative expression/secretion vectors for quasi-constitutive expression of heterologous proteins in the yeast *Yarrowia lipolytica*." *J Mol Microbiol Biotechnol* **2**(2): 207-216.
- Wong, L., J. Engel, E. Jin, B. Holdridge and P. Xu (2017). "YaliBricks, a versatile genetic toolkit for streamlined and rapid pathway engineering in *Yarrowia lipolytica*." *Metabolic Engineering Communications* **5**(Supplement C): 68-77.
